1 **Distinct Neuropeptide-Receptor Modules Regulate a Sex-Specific Behavioral Response to a**  
2 **Pheromone**

3

4 **Author Names and Affiliations:**

5 Douglas K. Reilly<sup>1,6</sup>, Emily J. McGlame<sup>1,7</sup>, Elke Vandeweyer<sup>2</sup>, Annalise M. Robidoux<sup>1,3</sup>, Haylea  
6 T. Northcott<sup>1,4,8</sup>, William Joyce<sup>5</sup>, Mark J. Alkema<sup>5</sup>, Robert J. Gegear<sup>9</sup>, Isabel Beets<sup>2</sup>, Jagan  
7 Srinivasan<sup>1,4,\*</sup>

8

9 <sup>1</sup> Department of Biology and Biotechnology, Worcester Polytechnic Institute, Worcester, MA  
10 01605, USA

11 <sup>2</sup> Neural Signaling and Circuit Plasticity Group, Department of Biology, KU Leuven, Leuven,  
12 BEL

13 <sup>3</sup> Department of Chemistry and Biochemistry, Worcester Polytechnic Institute, Worcester, MA  
14 01605, USA

15 <sup>4</sup> Program of Bioinformatics and Computational Biology, Worcester Polytechnic Institute,  
16 Worcester, MA 01605, USA

17 <sup>5</sup> Neurobiology Department, University of Massachusetts Medical School, Worcester, MA  
18 01605, USA

19 <sup>6</sup> Present address: Tufts University, Medford, MA 02155, USA

20 <sup>7</sup> Present address: AbbVie Foundational Neuroscience Center, Cambridge, MA 02139, USA

21 <sup>8</sup> Present address: Optum, Hartford, CT 06103, USA

22 <sup>9</sup> Department of Biology, University of Massachusetts Dartmouth, Dartmouth, MA 02747, USA

23 \* Corresponding author: Jagan Srinivasan, [jsrinivasan@wpi.edu](mailto:jsrinivasan@wpi.edu)

24 **Key words:** *C. elegans*, Ascaroside, Pheromone, Behavioral Valence, Neuropeptide, Sex-  
25 specific  
26

27 **Abstract**

28 Dioecious species are a hallmark of the animal kingdom, with opposing sexes responding  
29 differently to identical sensory cues. Here, we study the response of *C. elegans*' to the small-  
30 molecule pheromone, ascr#8, which elicits opposing behavioral valences in each sex. We  
31 identify a novel neuropeptide-neuropeptide receptor (NP/NPR) module that is active in males,  
32 but not in hermaphrodites. Using a novel paradigm of neuropeptide rescue that we established,  
33 we leverage bacterial expression of individual peptides to rescue the sex-specific response to  
34 ascr#8. Concurrent biochemical studies confirmed individual FLP-3 peptides differentially  
35 activate two divergent receptors, NPR-10 and FRPR-16. Interestingly, the two of the peptides  
36 that rescued behavior in our feeding paradigm are related through a conserved threonine,  
37 suggesting that a specific NP/NPR combination sets a male state, driving the correct behavioral  
38 valence of the ascr#8 response. Receptor expression within pre-motor neurons reveals novel  
39 coordination of male-specific and core locomotory circuitries.

40

41

42

## 43 **Introduction**

44 Sex-specific behaviors are unique aspects of survival throughout the animal kingdom from  
45 invertebrates to humans <sup>1-3</sup>. These behaviors include a wide range of coordinated and genetically  
46 pre-programmed social and sexual displays that ensure successful reproductive strategies,  
47 ultimately resulting in survival of the species in its natural environment <sup>2,3</sup>. The neural circuits  
48 regulating these behavioral responses are conserved, and often shared between sexes, but  
49 dependent on social experience and physiological state <sup>2</sup>. For example, the vomeronasal and  
50 main olfactory epithelium in mice are required for male aggression and mating, but in females  
51 they contribute towards receptivity and aggression <sup>3</sup>. Prominent among these stimuli are mating  
52 cues <sup>4</sup>; while the visual displays of higher order animals are among the most apparent of these,  
53 chemical mating cues are the most ubiquitous, with entire sensory organs dedicated to  
54 pheromone sensation <sup>5</sup>.

55 Pheromones are small-molecule signals between conspecifics that convey information on the  
56 sender's current physiological state, and potentially life stage and developmental history <sup>6,7</sup>. How  
57 the nervous system responds to these stimuli is dependent on both the internal, physiological  
58 state of the animal <sup>8</sup>, and external, concurrently sensed stimuli <sup>9</sup>. We have previously shown that  
59 behavioral response to pheromones is directly dependent on the physiological state of the animal  
60 <sup>10</sup>, though the mechanisms which determine such responses remain enigmatic.

61 Nematodes communicate through a large and growing class of pheromones termed  
62 ascarosides (ascr) <sup>6</sup>. These small molecules convey social as well as developmental information,  
63 and the assays used to understand the roles of these cues have varied <sup>4,6</sup>. There are multiple  
64 ascarosides found to communicate attractive behaviors, specifically in a sex-specific manner,  
65 including: ascr#1, ascr#2, ascr#3, ascr#4, and ascr#8 <sup>11</sup>. Unique among ascaroside structures is

66 the presence of a *p*-aminobenzoate group – a folate precursor that *C. elegans* are unable to  
67 synthesize, yet obtain from bacterial food sources<sup>12</sup> – at the terminus of *ascr#8*. This pheromone  
68 has previously been shown to act as an extremely potent male attractant, being sensed via a  
69 chemosensory pathway shared with *ascr#3*: the male specific CEM neurons<sup>13</sup>. However,  
70 whereas *ascr#3* is also sensed by over half a dozen chemosensory neurons<sup>13-16</sup>, *ascr#8* has only  
71 been shown to be sensed by the male-specific CEM<sup>13</sup>.

72 While the CEMs offer a sex-specific mode of chemosensation for *ascr#8*, neuromodulators  
73 and hormones are heavily implicated in all stages of the sex-specific and pheromone-elicited *C.*  
74 *elegans* mating behaviors. Prior to sensation of mating cues, the mate searching behavior of male  
75 *C. elegans* is modulated by the neuropeptide, PDF-1<sup>17,18</sup>. Interestingly, this neuropeptide also  
76 controls the sexual identity of the ASJ chemosensory neurons<sup>19</sup>. The mating pheromone *ascr#3*  
77 is modulated by insulin signaling<sup>20</sup>, while activation of *ascr#3*-sensing neurons also activates the  
78 NPR-1 receptor<sup>16</sup>. Finally, the physical act of male sexual turning during mating is mediated by  
79 multiple FMRFamide-like peptides<sup>21</sup>. This complex regulation of behaviors relies on specific  
80 neuropeptide-neuropeptide receptor (NP/NPR) modules.

81 Unique NP/NPR modules are known to drive specific physiological and behavioral responses  
82 in *C. elegans*<sup>22</sup>. While DAF-2 propagates insulin-like peptide (*ins*) signaling, the specific  
83 peptide determines the effect. For example, *ins-4* functions in learning, while *ins-6* affects  
84 synapse formation<sup>23,24</sup>. Meanwhile, avoidance of *ascr#3* by hermaphrodites is mediated in part  
85 by INS-18/DAF-2 signaling – higher levels of *ins-18* expression result in lower *ascr#3* avoidance  
86 rates<sup>20</sup>. Conversely, FMRFamide-like peptide (*flp*) genes, many of which encode multiple  
87 peptides, signal through a complex network in which multiple receptors sense identical peptides,  
88 and multiple FLP peptides activate the same receptors. For instance, activation of NPR-4 by

89 FLP-18 modulates reversal length<sup>25</sup>, while the sensation of the divergent FLP-4 by the same  
90 receptor contributes to food preference choice<sup>26</sup>.

91 Here, we investigate the neuronal mechanisms governing the behavioral attractive response  
92 of male *C. elegans* to ascr#8<sup>27</sup>. Males exhibit a unique behavioral tuning curve to ascr#8,  
93 preferring concentrations in the 1  $\mu$ M range, no longer being attracted to higher concentrations  
94<sup>13</sup>. Given that multiple *flp* NP/NPR modules have been shown to play roles in setting  
95 physiological state<sup>28</sup>, as well as linking sensation to physiology and behavior<sup>29-31</sup>, we reasoned  
96 that peptidergic signaling is likely to play a role in the male ascr#8 behavioral response.

97 Previous studies of *C. elegans* behavioral responses to attractive social ascarosides employed  
98 a Spot Retention Assay (SRA)<sup>13,32</sup>. However, we found that the SRA contains several  
99 drawbacks, including male-male contact and the inability to track individual animals through the  
100 course of an assay. To address these issues, we have developed a single worm attraction assay  
101 (SWAA): a more robust assay that determines variables on a per-worm basis, and not solely at  
102 the population level. We utilized our novel SWAA to examine the responses of *him-8* males  
103 defective in *flp* neuropeptide genes expressed in male-specific neurons; *flp-3*, *flp-6*, *flp-12*, and  
104 *flp-19*<sup>33</sup>. In doing so, we discovered that *flp-3* plays a role in determining the sex-specific  
105 behavioral valence: i.e., determining whether the response to ascr#8 is attractive or aversive  
106<sup>15,34,35</sup>.

107 We identified two divergent FLP-3 receptors responsible for sensing the processed  
108 neuropeptides. Receptor activation studies elucidated that the previously identified *flp-3*-sensing  
109 G protein-coupled receptor, NPR-10<sup>22</sup>, and the novel FRPR-16, are both activated by FLP-3  
110 peptides at nanomolar affinities. Additionally, loss-of-function mutations in either receptor result  
111 in behavioral defects that parallel those observed in *flp-3* mutants.

112 To more completely understand the role of *flp-3* in mediating the *ascr#8* behavioral response,  
113 we adapted a peptide rescue-by-feeding protocol<sup>36</sup>. Using this method, we were able to rescue  
114 individual peptides in *flp-3* mutant animals and showed that a specific subset of FLP-3 peptides  
115 responsible for suppressing the avoidance differs from those responsible for driving male  
116 attraction to *ascr#8*.

117 Here we show that individual neuropeptides encoded by the *flp-3* gene exhibit specific  
118 biological activity, by binding multiple receptors, to drive the behavioral valence to a cue in a  
119 sex-specific manner.

## 120 **Results**

### 121 **Spot Retention Assay vs. Single Worm Assay**

122 We adapted the Spot Retention Assay (**Supp. Fig. 1**)<sup>27,37</sup> to allow for better characterization of  
123 individual worm behavior and robust interrogation of attraction to small molecules. We first  
124 compared the attractiveness of 1  $\mu$ M *ascr#8* (**Fig. 1A, inset**) across multiple strains of *C. elegans*  
125 (the wild-type N2 strain, the high incidence of male *him-5* and *him-8* strains, and the  
126 chemosensory cilia defective *osm-3*), using our novel behavioral assay, the single worm  
127 attraction assay (SWAA) (**Fig. 1A**). In this assay, individual animals are placed directly into the  
128 spot of the ascaroside cue while simultaneously removing any potential of male-male contact.

129 *C. elegans* exhibited a significant increase in the amount of time spent within *ascr#8* spot  
130 compared to the vehicle control (**Fig. 1 B, C**), in all wild-type and *him* strains tested, in line with  
131 SRA results (**Supp. Fig. 1**). Normalized increase in dwell time, calculated as  $\log(\text{fold-change})$   
132 [i.e., ascaroside dwell time over vehicle dwell time], allows for direct comparison between  
133 strains and conditions while accounting for baseline variability in vehicle dwell times. Using this

134 log(fold-change) metric, we can see that the increase in attraction to ascr#8 is consistent across  
135 N2, *him-5*, and *him-8* strains (**Fig. 1C**).

136 This assay also allows for measurement of the number of visits per worm (**Supp. Fig. 2A,**  
137 **C**), as well as the percentage of attractive visits to the cue, revealing no difference between any  
138 strain (**Supp. Fig. 2B**). Measuring attraction as of visits longer than two standard deviations  
139 above the mean vehicle dwell time, we show that males are indeed attracted to the cue itself, and  
140 not the male-male contact. These results also show that it is in fact a minority of animals (30%-  
141 45%) that exhibit attractive visits to the cue (**Supp. Fig. 2B**). This rate of behavioral attraction is  
142 consistent with calcium imaging experiments wherein ascr#8 exposure elicits similar rates of  
143 calcium transients in the CEM neurons<sup>38</sup>.

144 Unlike the SRA, wherein hermaphrodites did not exhibit any difference in dwell time  
145 between vehicle and ascr#8 (**Supp. Fig. 1D, E**), our SWAA revealed that hermaphrodites from  
146 all strains consistently spent significantly less time in ascr#8 than the vehicle, with no difference  
147 between the spatial and vehicle control dwell times (**Fig. 2D,E**). Hermaphrodites also visited the  
148 ascaroside cue less than they did vehicle or spatial control well centers and exhibited little-to-no  
149 attractive visits (**Supp. Fig 2. C, D**).

150 Together, these data validate the SWAA as a robust assay for the measurement of the  
151 attractiveness of a cue on a single animal basis in both sexes. It also provides data on visit count  
152 and the percent of attractive visits that was previously impossible utilizing the SRA.  
153 Interestingly, attractive visits were only observed in 30%-45% of the time (**Supp. Fig. 2B**),  
154 suggesting that the individual state of the animal plays a critical role in determining the  
155 behavioral response to the ascaroside, as seen in other ascaroside behavioral responses<sup>10,39</sup>.



## 156 **Peptidergic Signaling Drives Sex-Specific ascr#8 Behavioral Response**

157 Several neuropeptides of the FMRFamide-like-peptide (FLP) family have been implicated in the  
158 mechanosensory regulation of male-mating behavior<sup>37</sup>. The genes encoding the neuropeptides  
159 *flp-8*, *flp-10*, *flp-12*, and *flp-20* all suppress the number of turns around a hermaphrodite executed  
160 by a male prior to mating<sup>21</sup>. Despite this enrichment of *flp* genes functioning in the  
161 mechanosensation of these male specific behaviors<sup>21</sup>, there has been no neuropeptide found to  
162 regulate the chemosensation of mating ascarosides. We sought to understand why an attractive  
163 concentration of a mating pheromone does not result in consistent attraction (**Supp. Fig. 2B**) by  
164 investigating potential peptidergic signaling pathways that function in the sensation of ascr#8.

165 We focused our initial screening of neuropeptides on the FLP family. We generated *him-8*  
166 lines of *flp* genes expressed in male-specific neurons, specifically *flp-3*, *flp-6*, *flp-12*, and *flp-19*  
167<sup>33</sup>. To avoid confounding variables, our criteria for selection stipulated that outside of male-  
168 specific neurons, expression profiles would be limited to a small number of neurons (*flp-5* was  
169 therefore excluded as it exhibits expression in the pharyngeal muscle; while *flp-21* and *flp-22* are  
170 expressed in a large number of neurons outside of the male-specific expression profiles).

171 We found that loss of *flp-3* strongly affected the ability of male *C. elegans* to respond to  
172 ascr#8, (**Fig. 2A, B, Supp. Fig. 3A, B**). The log(fold-change) of *flp-3* is the only value  
173 significantly different than that seen in the wild-type (**Fig. 2B**). Interestingly, there was no defect  
174 seen in *flp-3* hermaphrodites, nor any other strain (**Fig 2D, E, Supp. Fig. 3C, D**).

175 Because the defect in male response to ascr#8 was significant, and the SWAA was designed  
176 to detect attractive behaviors, we sought to determine if *flp-3* loss-of-function (*lof*) animals were  
177 in fact avoiding ascr#8. Using a previously described drop avoidance assay<sup>10,40</sup>, we exposed  
178 forward moving animals to a drop of either vehicle control or ascr#8 and scored the avoidance

179 index. Wild-type males did not avoid the cue, as expected for an attractive cue, while *flp-3 lof*  
180 males strongly avoided the pheromone (**Fig. 2C**). The hermaphroditic behavior was unaffected  
181 by the loss of *flp-3*. (**Fig. 2F**). Together, these results suggest that *flp-3* functions to control the  
182 behavioral valence of the *ascr#8* response to be attractive in a sex-specific manner; serving in  
183 males to suppress a basal avoidance behavior observed in hermaphrodites.

184 Rescue of *flp-3* under a 4-kb region of its endogenous promoter was able to restore the  
185 behavioral valence of males to wild-type levels (**Fig. 2G-I, Supp. Fig. 3E, F**). While  
186 overexpression of neuropeptides can result in dominant negative phenotypes<sup>17</sup>, expression of the  
187 *flp-3* construct in wild-type animals did not alter wild-type behavioral response to *ascr#8*  
188 (**Fig.2G-I, Supp. Fig. 3E, F**).

189 To rule out an allele specific effect of the *flp-3(pk361)* mutation, which results in deletion of  
190 the entire coding sequence as well as 439 bp of upstream and 1493 bp of downstream genomic  
191 sequence<sup>41</sup>, we also assayed *flp-3(ok3265)*, an in-frame deletion of the coding sequence that  
192 retains expression of two peptides produced by the *flp-3* gene<sup>42</sup> (FLP-3-1 and FLP-3-4) (**Supp.**  
193 **Fig. 4A**). The *flp-3(pk361)* and *flp-3(ok3265)* mutant phenotypes were identical (**Supp. Fig. 4B-**  
194 **F**), confirming that the deletion in the *pk361* allele did not cause any off-target effects, and that  
195 the two peptides encoded by the *ok3625* allele were not sufficient to rescue the mutant  
196 phenotype.

### 197 **FLP-3 Functions Specifically to Modulate the *ascr#8* Behavioral Response**

198 While *ascr#8* is a potent male-attracting pheromone, previous studies have shown that *ascr#2*,  
199 *ascr#3*, *ascr#4* also function synergistically in attracting males<sup>32</sup>. The CEM neurons that are  
200 required for *ascr#8* sensation also function in *ascr#3* sensation<sup>13</sup>. While *ascr#3* signal  
201 propagation is processed through the hub-and-spoke circuit centered around RMG<sup>15,16,43</sup>, little is

202 known about the mechanics of *ascr#8* sensation outside of CEM involvement<sup>13</sup>. To determine if  
203 *flp-3* functions to regulate pheromone-mediated male attraction and avoidance in a general  
204 manner, or rather one specific to *ascr#8*, we assayed the response of wild-type and *flp-3 lof* males  
205 to *ascr#3*, a cue for which behavioral valence has also recently been shown to be regulated in a  
206 sex-specific manner<sup>15</sup>. We found that *flp-3 lof* males exhibited no defect in their attractive  
207 response to *ascr#3* (**Supp. Fig. 5**), suggesting that its role is indeed specific to that of *ascr#8*  
208 sensation.

209 Expression analysis of a FLP-3 translational fusion (*pflp-3::flp-3::mCherry*) confirmed  
210 previous expression analyses of the neuropeptide within male-specific spicule neurons<sup>33,44</sup> (**Fig.**  
211 **2J-L, Supp. Fig. 6A-C**). Transcriptional reporters have shown robust *flp-3* expression in the  
212 amphid IL1 neurons, as well as the interneurons PQR and the male-specific CP9, although our  
213 translational fusion exhibited no PQR or CP9 expression (**Fig. 2J-L, Supp. Fig. 6A-C**). Previous  
214 studies employed 1-2 kb regions of promoter sequence driving GFP expression, while our  
215 construct employs a 4 kb region, thereby incorporating further regulatory elements that may  
216 restrict expression patterns. By including the full coding sequence in our translational fusion, we  
217 have also incorporated the regulatory elements found within the introns of the *flp-3* gene<sup>45</sup>.

218 Interestingly, we observed localization of mCherry within sensory cilia of the dorsal and  
219 ventral IL1 neurons, as well as in puncta spanning their dendrites (**Supp. Fig. 6D-F**), consistent  
220 with peptide packing into dense core vesicles<sup>46</sup>. Recent single-cell RNA-sequencing of the adult  
221 nervous system has again found more prolific expression of *flp-3* within the nervous system,  
222 including most of the VC neurons<sup>47</sup>. However, these studies were performed only in  
223 hermaphrodites, and were therefore unable to examine any male-specific expression changes.  
224 Our *flp-3* construct exhibits spicule- and IL1D/V-specific expression and completely rescued the

225 attractive response to *ascr#8* (**Fig. 2G-I, Supp. Fig. 3E, F**), suggesting a physiologically relevant  
226 site-of-release from this small number of neurons.

227 Because the spicule neurons are exposed to the environment<sup>48</sup>, we investigated whether they  
228 play a direct role in the sensation of *ascr#8*. To test this, we assayed *ceh-30 lof* males for their  
229 ability to avoid *ascr#8*. Male *ceh-30 lof* animals lack the male-specific CEM neurons responsible  
230 for *ascr#8* sensation in the amphid region of the animal<sup>13,49</sup>. *him-5* males did not avoid *ascr#8*  
231 (**Supp. Fig. 7**). Males lacking CEM neurons also did not avoid *ascr#8* (**Supp. Fig. 7**). However,  
232 with *flp-3* still present in these animals, it may be that they are still able to sense the cue, but do  
233 not avoid it due to the presence of the neuropeptide. We therefore generated a *ceh-30;flp-3*  
234 double mutant, and found that these animals still do not avoid the pheromone (**Supp. Fig. 7**),  
235 confirming that the CEM neurons are the sole source of *ascr#8* chemosensation in male *C.*  
236 *elegans*<sup>13</sup>.

### 237 **FLP-3 Regulates Attractive Behavior to *ascr#8* by Activation of Two Evolutionarily** 238 **Divergent G protein-coupled Receptors**

239 The *flp-3* gene encodes multiple peptides<sup>22</sup>. Recent studies have uncovered a tenth peptide  
240 encoded by the gene; although this newest peptide does not contain the conserved GTMRFamide  
241 motif found in the remainder of *flp-3* peptides (**Fig. 3A**)<sup>50</sup>. We determined that the lysine-  
242 arginine sites flanking the individual peptides are processed specifically by the proprotein  
243 convertase encoded by the *egl-3* gene, and not by *aex-5* or *bli-4*<sup>21,51,52</sup> (**Supp. Fig. 8**), supporting  
244 previous studies that the *egl-3* gene is the proprotein convertase involved in mating behaviors<sup>21</sup>.

245 To better understand where the fully processed peptides act within the male-specific circuit,  
246 we assayed mutants for receptors that have previously shown activation upon FLP-3 peptide  
247 exposure. While activation of NPR-4 has been reported for only two peptides encoded by *flp-3*,

248 NPR-5 and NPR-10 have been shown to respond to four and six *flp-3* encoded peptides,  
249 respectively (**Fig. 3A**)<sup>22</sup>. Recent studies have considered NPR-4 and NPR-10 to be  
250 representative of one another due to their close phylogenetic relationship and separation by a  
251 recent gene duplication<sup>53</sup>. However, in our testing of these mutants using our SWAA, we found  
252 that *npr-4* and *npr-5 lof* males respond similarly to *him-8* males (**Fig. 3B-D, Supp. Fig. 9**) while  
253 *npr-10 lof* animals exhibited a complete loss of attraction to the cue, as well as a partial  
254 avoidance phenotype matching that of *flp-3 lof* mutants (**Fig. 3B-D, Supp. Fig. 9**).

255 Transgenic rescue by an NPR-10::GFP translational fusion construct expressed under 1.6 kb  
256 of the endogenous promoter was able to restore wild-type levels of attraction in an *npr-10 lof*  
257 mutant background (**Fig. 3C, Supp. Fig. 9A, B**). This construct was also able to suppress the  
258 avoidance phenotype of *npr-10* (**Fig. 3D, Supp. Fig. 9C**). Expression analysis of NPR-10::GFP  
259 revealed expression in both amphid and phasmid regions of the animals (**Figure 3E, F, Supp.**  
260 **Fig. 9D, E**). Among these head neurons are the inner labial IL2 neurons, as well as their  
261 respective socket cells (ILso). NPR-10::GFP fluorescence was also observed in the ADL and  
262 ASG chemosensory neurons, cells which synapse onto AVD and AIA (**Fig. 7**), contributing to  
263 reversal control and turning circuitries, respectively. The localization of NPR-10 in the RMEL  
264 and RMEV neurons provides a direct input into neurons innervating muscle cells (**Fig. 3E, Fig.**  
265 **7**). Alongside expression in the interneuron AVK (**Fig. 3E**), which links the *npr-10* circuitry to  
266 the backwards locomotion neuron AVE, AVF expression (**Fig. 3E**) links the circuit to the  
267 forward locomotion pre-motor interneuron, AVB (**Fig. 7**).

268 NPR-10 expression was also observed in the B-class ray neurons in the male tail (**Fig. 3F**).  
269 Given the tight localization of these cells, it may be that NPR-10 is also present in the HOB  
270 neuron, although without further colocalizing studies, it is impossible to tell. However, the RnB

271 neurons that express NPR-10 to sense SPD-secreted FLP-3 peptides heavily innervate the male-  
272 specific interneuron, EF1, which travels from the tail to synapse onto neurons in the head of the  
273 animal (**Fig. 7**), including the forward locomotion neuron, AVB. Interestingly, the hermaphrodite  
274 tail expression in the dorso-rectal ganglion neurons DVA, DVB, DVC, and ALN (**Supp. Fig.**  
275 **9E**).

276 Using Chinese hamster ovarian (CHO) cell cultures stably expressing the promiscuous G  
277 protein, G $\alpha$ 16, and the calcium reporter, aequorin<sup>54</sup>, we found that both isoforms of NPR-10 are  
278 activated by seven of the ten FLP-3 peptides (**Supp. Fig. 10A, B**), with half-maximal effective  
279 concentrations (EC<sub>50</sub>) in the nM range (**Fig. 4**). Peptide FLP-3-6 (EDGNAPFGTMKFamide) did  
280 not activate NPR-10 in our assay. This peptide contains an R-to-K mutation within the C-  
281 terminal motif which may explain the lack of receptor activation. Likewise, peptide FLP-3-10  
282 (STVDSSEPVIRDQ), which contains no sequence homology with any RFamide peptide (**Fig.**  
283 **4I**) also failed to activate the receptor. Interestingly, FLP-3-8 (SADDSAPFGTMRamide) did  
284 not activate either NPR-10A or NPR-10B, despite its conserved terminal amino acid sequence  
285 (**Supp. Fig. 10A, B**).

286 The lack of full avoidance phenotype observed in *npr-10 lof* mutants suggests that there are  
287 other FLP-3 receptors involved in regulating the *ascr#8* avoidance behavior. Interestingly, while  
288 the short neuropeptide F receptor, NPR-10, is required for FLP-3 sensation, the *Drosophila* FR  
289 receptor homolog, FRPR-16, was also found to be reliably activated by FLP-3 peptides *in vitro*  
290 (**Supp. Fig. 10C**). This evolutionarily divergent receptor exhibited potencies in the 10-  
291 nanomolar range for seven of the peptides, and sub-micromolar for an eighth peptide (**Fig. 4**).  
292 Again, FLP-3-6 and FLP-3-10 did not activate FRPR-16, supporting the notion that the terminal  
293 motif conserved in the remaining FLP-3 peptides is critical for receptor activation. Cells

294 transfected with a control vector did not exhibit any activation following exposure to FLP-3  
295 peptides, confirming that the activation observed is specific to receptor-ligand interactions with  
296 NPR-10 and FRPR-16 (**Supp. Fig. 10D**).

297 A full-gene deletion of *frpr-16* was generated using CRISPR mutagenesis (**Fig. 5A, B**)<sup>55</sup>.  
298 We assayed *frpr-16 lof* males for their ability to respond to *ascr#8*. Males lacking *frpr-16*  
299 exhibited a loss of attraction to *ascr#8*, as well as a partial avoidance phenotype, like that  
300 observed in *npr-10 lof* mutant animals (**Fig. 5, Supp. Fig. 11**). However, a double mutant  
301 containing both *npr-10* and *frpr-16* null alleles did not result in an additive effect in the  
302 avoidance phenotype, suggesting that these receptors are non-redundant in their functions (**Fig.**  
303 **5E, Supp. Fig. 11C**).

304 Rescue of FRPR-16 under 1.9 kb of its endogenous promoter was able to restore wild-type  
305 attractive behavior (**Fig. 5C, D, Supp. Fig. 11A, B**), as well suppress the avoidance phenotype  
306 (**Fig. 5E, Supp. Fig. 11C**). Localization of the mCherry fusion reporter was observed in the pre-  
307 motor interneurons responsible for reverse locomotory control: AVA, AVE, and AVD (**Fig. 5F**).  
308 The fluorescent protein was also seen anterior to the nerve ring in the gas-sensing BAG neuron  
309 (**Fig. 5F**). This expressing pattern was not sex-specific, as a matching expression pattern was  
310 observed in hermaphrodites (**Supp. Fig. 11D**). Together, these data show that NPR-10 and  
311 FRPR-16 function as receptors for FLP-3 peptides.

### 312 **Rescue of Individual FLP-3 Peptides by Feeding Reveals a Specific Subset of Active** 313 **Peptides Required for Attractive Behavior**

314 To identify which FLP-3 peptides are required for male avoidance of *ascr#8*, we adopted a  
315 peptide feeding approach, similar to RNAi feeding, as initially described previously<sup>36</sup>. Using  
316 Gateway Cloning technology, we first inserted the peptide coding sequences for the FLP-3

317 peptides unable to rescue the *ascr#8* response in the *ok3625* allele (**Supp. Fig. 4**), FLP-3-1  
318 (SPLGTMRFamide) and FLP-3-4 (NPLGTMRFamide) in our assays (**Fig. 6**). *flp-3 lof* animals  
319 were grown on lawns of bacteria expressing the rescue constructs, and their progeny were tested  
320 by both SWAA and avoidance assays (**Fig. 6B-D, Supp. Fig. 12**). Peptides FLP-3-1 and FLP-3-  
321 4 were unable to rescue either phenotype on their own (**Fig. 6B-D, Supp. Fig. 12**), supporting  
322 the *flp-3(ok3625)* data suggesting that these two peptides are insufficient to maintain wild-type  
323 behavior (**Supp Fig. 4**).

324 FLP-3-1 and FLP-3-4 differ in sequence only in their N-terminal amino acid. Similarly, a  
325 single amino acid change is all that distinguishes them from FLP-3-2 (TPLGTMRFamide),  
326 which we then tested for its ability to rescue the *flp-3 lof* phenotype. Surprisingly, this peptide  
327 was able to abolish the avoidance phenotype observed in *flp-3 lof* animals (**Fig. 6B, Supp. Fig.**  
328 **12A**). However, it was not able to restore the animal's ability to be attracted to *ascr#8* (**Fig. 6**  
329 **C,D, Supp. Fig. 12C**). The only difference being the presence of a threonine in that position of  
330 the peptide, we hypothesized that this may be the required component to suppress the avoidance  
331 behavior. Peptide FLP-3-9 (NPENDTPFGTMRFamide) contains a threonine in the same  
332 location of the peptide. The N-terminus is capped with a NPEND sequence, and the lysine  
333 conserved in FLP-3-1, 3-2, and 3-4 is mutated to a phenylalanine. However, when *flp-3 lof*  
334 animals were fed NPENDTPFGTMRFamide, they not only displayed lack of avoidance to  
335 *ascr#8*, but a full rescue of their ability to be attracted to the cue (**Fig. 6, Supp. Fig. 12**). We also  
336 tested FLP-3-10 (STVDSSEPVIRDQ), which exhibits a lack of consensus sequence and an  
337 inability to activate either NPR-10 or FRPR-16. The non-RFamide peptide was unsurprisingly  
338 unable to rescue the avoidance phenotype (**Fig. 6B, Supp. Fig. 12A**).



339 We hypothesize that the threonine in the ninth position from the C-terminus is critical for  
340 suppression of the basal avoidance response, as both FLP-3-2 and FLP-3-9 were capable of  
341 doing so, while FLP-3-1 and FLP-3-4 were not (**Fig. 6, Supp. Fig. 12**). Likewise, the NPEND  
342 sequence in FLP-3-9 may convey specificity to the peptide, allowing it to drive attraction to the  
343 pheromone.

#### 344 **Discussion**

345 Our results reveal a complex mechanism regulating the sex-specific behavioral response to a  
346 pheromone guided through the interaction of two peptides encoded by a single neuropeptide  
347 precursor gene and two divergent GPCRs. Peptidergic modulation of neural circuits has long  
348 been hypothesized as complex <sup>56</sup>, and here we elucidate the recruitment of two  
349 neuropeptide/neuropeptide-receptor (NP/NPR) modules, FLP-3/NPR-10 and FLP-3/FRPR-16,  
350 that both serve to regulate the nervous system in sensing and respond to *asr#8* in a sex-specific  
351 manner. Our results elucidate that not all of the peptides encoded by the FLP-3 pro-peptide are  
352 involved in the regulation of the sex-specific circuit, but rather a subset function through two  
353 unique NP/NPR modules to drive the behavioral response. The involvement of two  
354 evolutionarily divergent receptors in sensing specific FLP-3 neuropeptides suggests that the sex-  
355 specific behavioral response to *asr#8* module is a result of the activity of two distinct NP/NPR  
356 modules that mediate both attractive and repulsive properties of the small molecule.

357 These findings are consistent with neuromodulators regulating behavioral states in both  
358 invertebrates and vertebrates. Multiple hormonal receptors are involved in regulating the  
359 induction of *A. aegyptii* ecdysteroid hormone production through two different neuropeptide  
360 signaling systems: ILP3 initiates digestion of the blood meal <sup>57</sup>, while OEH stimulates oocyte  
361 yolk uptake <sup>58</sup>. Melanin-concentrating hormone is a neuropeptidergic hormone that promotes

362 appetite and feeding behaviors in mice in a sex-dependent manner<sup>59</sup>. Meanwhile, age-dependent  
363 changes in levels of Neuropeptide F result in the promotion of survival-benefiting appetitive  
364 memory in *Drosophila*, concurrent with the impairment of memories associated with insufficient  
365 survival benefits<sup>60</sup>.

366 Here, we show that two NP/NPR modules driven by the single neuropeptide gene *flp-3* serve  
367 to drive sex-specific attraction to the male attracting pheromone, *ascr#8*<sup>13,27</sup> (**Fig. 2**). These  
368 modules serve to simplify the immensely complex peptidergic connectome of the nervous system  
369<sup>56</sup>. Hermaphrodites avoid the pheromone, regardless of the presence of *flp-3* (**Fig. 2F**), while  
370 males lacking any component of the two NP/NPR modules “revert” to the hermaphroditic  
371 response (**Fig. 2C**).

372 This suggests that the complexity of the expansive class of FMRFamide-related peptide  
373 (FLP) genes in *C. elegans*, of which there are 31 genes encoding over 70 unique peptides<sup>41</sup>,  
374 function through an even greater number of NP/NPR modules to drive specific behavioral or  
375 physiological states. FLPs have been identified as regulators of a variety of behavioral and  
376 sensory mechanisms, including locomotion<sup>18</sup>, egg-laying<sup>41</sup>, gas sensing<sup>61</sup>, sleep<sup>28</sup>, and mating  
377<sup>21,62</sup>. Here, we show that *flp-3* functions to coordinate *ascr#8* sensation with attractive behavior.  
378 Not every male is attracted to *ascr#8*, as only 30-45% of males exhibit attractive responses  
379 (**Supp. Fig. 2B**), which interestingly matches well with the rate of CEM chemosensory neuron  
380 calcium transient activity upon exposure to mating ascarosides<sup>38</sup>.

381 Two GPCRs respond to FLP-3 peptides to function in the behavioral response to *ascr#8*: the  
382 previously identified NPR-10, and the novel FRPR-16 (**Fig. 3-5**). Both exhibit high potencies for  
383 multiple FLP-3 peptides, although our single peptide rescues have shown that FLP-3-2 and FLP-  
384 3-9 are required for the wild-type response to *ascr#8* (**Fig. 6**), while FLP-3-1, FLP-3-4, and FLP-

385 3-10 are not. As such, multiple NP/NPR modules are implicated in the *ascr#8* behavioral  
386 response. Further studies will allow for further separation of FLP-3-2 and FLP-3-9, and how they  
387 interact with NPR-10 and FRPR-16.

388 Interestingly, these two high-potency FLP-3 receptors are divergent in their evolutionary  
389 history. NPR-10 is most related to other “NPR” *C. elegans* receptors that evolved from the same  
390 family as the *Drosophila melanogaster* short neuropeptide F receptor family<sup>63,64</sup>. FRPR-16,  
391 however, is more closely related to the fly FMRFamide Receptor<sup>65</sup>. Interestingly, while some *C.*  
392 *elegans* FRPRs function as FLP receptors<sup>18,62,66</sup>, at least one receptor within the same  
393 evolutionary clade (DAF-37) acts as a chemosensor for pheromones<sup>67</sup>.

394 The presence of FRPR-16 in the amphid pre-motor interneurons responsible for backwards  
395 locomotion (**Fig. 5**) suggests the FLP-3/FRPR-16 module serves to mediate reversals during  
396 *ascr#8* sensation (**Fig. 7**). Conversely, while FRPR-16 is confined to a small, yet biologically  
397 specific subset of neurons in the head of the animals, NPR-10 exhibits more promiscuous  
398 expression that innervates both forward and reverse locomotion circuitries (**Fig 3E, F**). As such,  
399 while the FLP-3/FRPR-16 module specifically modulates reversals, the FLP-3/NPR-10 module  
400 may instead serve to balance both forward and backwards locomotion in response to *ascr#8*,  
401 allowing the animal to more thoroughly interrogate its surroundings. Future studies incorporating  
402 cell-specific rescue of both NPR-10 and FRPR-16 will further elucidate this circuitry.

403 We pose that the EF1 circuitry connecting the tail to the amphid pre-motor neurons, inferred  
404 from the physical male connectome<sup>68</sup> (**Fig. 7**), serves to suppress forward locomotion: as the  
405 male travels down an *ascr#8* concentration gradient, information travels from the tail to the head,  
406 driving the animal to return to the *ascr#8*-containing region. How this sensation occurs, given

407 that the amphid CEM neurons are the sole source of *ascr#8* sensation (**Supp. Fig. 7**), remains a  
408 mystery.

409 Previous studies have linked the entirety of the gene to a receptor based on binding studies  
410 and full transgenic rescue<sup>28,66,69</sup>. Here, we employ a rescue-by-feeding assay, following the  
411 design of RNAi feeding protocols, to rescue individual peptides<sup>36</sup>. While “feeding” of peptides  
412 through soaking is a valid approach, there are many constraints on such approaches, the most  
413 prominent being the ability to acquire purified peptides<sup>28,66</sup>. Using our rescue-by-feeding  
414 approach, we provide access to the peptide to the worms directly through their food source.  
415 Combining biochemical receptor activation studies with behavioral rescue-by-feeding assays, we  
416 have been successful in elucidating discrete neuropeptide signaling modalities within the  
417 complex FLP-3 signaling system. This approach enables new avenues for characterizing the  
418 roles of the other neuropeptides in mediating diverse cellular and organismal processes.

419 In summary, we demonstrate that specific peptides encoded by *flp-3*, expressed in neurons of  
420 both the male head and tail, activate evolutionarily divergent receptors. These two NP/NPR  
421 modules mediate overlapping behavioral outputs, resulting the fine-tuned sex-specific behavioral  
422 response to *ascr#8* by simultaneously suppressing an avoidance response and driving an  
423 attractive response (**Fig. 7**). The entirety of the *flp-3* gene is not required to recapitulate wild-  
424 type behavior, suggesting that individual peptides from a single gene are involved in discrete  
425 NP/NPR modules.

426 **Methods**

427 **Strains**

428 Strains were obtained from the *Caenorhabditis* Genetics Center (University of Minnesota, MN),  
429 the National BioResource Project (Tokyo Women's Medical University, Tokyo, Japan), Chris Li  
430 at City University of New York, Paul Sternberg at the California Institute of Technology, Ding  
431 Xue at University of Colorado Boulder, and Maureen Barr at Rutgers University. The novel  
432 allele of *frpr-16* was generated via CRISPR editing using previously discussed methods<sup>55</sup>.  
433 Strains were crossed with either *him-5* or *him-8* worms to generate stable males prior to testing.  
434 See **Supp. Table. 1** for a comprehensive list of strains used in this study.

435 **Vector Generation**

436 Peptide constructs: DNA oligos containing the sequence for the peptides of interest were  
437 generated using Integrated DNA Technologies' Ultramer synthesis service. The DNA sequence  
438 encoding the peptide sequence was flanked with sequences encoding EGL-3 cut sites (MRFGKR  
439 upstream, and KRK-STOP) downstream. These sites were then flanked with Gateway Cloning  
440 sites attB1 and attB2. Annealed oligos were then used to perform a BP reaction with pDONR p1-  
441 p2 to generate the pENTRY clones. These vectors were then recombined with pDEST-527 (a  
442 gift from Dominic Esposito (Addgene plasmid # 11518) in LR reactions to generate the  
443 expression clones. The SCRAMBLE control was generated in an identical manner, with the  
444 sequence between the cut sites being amplified from pL4440 (provided by Victor Ambros,  
445 University of Massachusetts Medical School, MA).

446 Fusion constructs: DNA for the *flp-3*, *npr-10*, and *frpr-16* promoter and coding regions were  
447 isolated from *C. elegans* genomic DNA via PCR.

448 In generating the *flp-3* rescue product, PstI and BamHI restriction sites added onto the  
449 isolated fragments were introduced through primer design. PCR amplicons and the Fire GFP  
450 Vector, pPD95.75 (kindly provided by Josh Hawk, Yale University, CT), were digested with PstI  
451 and BamHI enzymes. Products were ligated together to generate JSR#DKR18 (*pflp-3::flp-*  
452 *3::GFP*). The *flp-3* expression analysis construct, JSR#DKR34 (*pflp-3::flp-3::SL2::mCherry*) was  
453 generated by Genewiz. The promoter-gene fragment of *npr-10* was generated by Gibson  
454 Assembly to GFP (from pPD95.75) and as a linear fusion. The rescue-fusion construct of *frpr-16*  
455 was achieved by fusing the promoter and gene sequence to mCherry isolated from JSR#DKR34  
456 via Gibson Assembly.

457 See **Supp. Table 2** for a complete plasmid list, and **Supp. Table 3** for primer and Ultramer  
458 sequences.

#### 459 **Transgenic Animals**

460 CB1489 animals were injected with JSR#DKR18 (*pflp-3::flp-3::GFP* at 20 ng/μL), using *punc-*  
461 *122::RFP* (at 20 ng/μL) (kindly provided by Sreekanth Chalasani at the Salk Institute, CA) as a  
462 co-injection marker to generate JSR81 (*him-8(e1489);worEx17[pflp-3::flp-3::GFP; punc-*  
463 *122::RFP]*). JSR81 was then crossed with JSR99 to generate JSR109 (*flp-3(pk361);him-*  
464 *8(e1489);worEx17[pflp-3::flp-3::GFP; punc-122::RFP]*).

465 PS2218 animals were injected with JSR#DKR34 (*pflp-3::flp-3::SL2::mCherry* at 25 ng/μL),  
466 using *punc-122::GFP* (at 50 ng/μL) as a co-injection marker to generate JSR119 (*dpy-*  
467 *20(e1362);him-5(e1490);syls33[HS.C3(50ng/μL) + pMH86(11ng/μL)];worEx21[pflp-3::flp-*  
468 *3::SL2::mCherry; punc-122::GFP]*).

469 JSR102 animals were injected with a linear fusion product (*pnpr-10::npr-10::GFP* at 25  
470 ng/μL), alongside *punc-122::RFP* (at 50 ng/μL) as a co-injection marker to generate JSR126

471 (*npr-10(tm8982);him-8(e1489);worEx37[pnpr-10::npr-10::GFP, punc-122::RFP]*). This was  
472 crossed with PT2727 (*myIS20 [pklp-6::tdTomato + pBX]*, a gift from Maureen Barr) to generate  
473 JSR138 (*myIS20 [pklp-6::tdTomato, pBX]; npr-10(tm8982);him-8(e1489);worEx37[pnpr-*  
474 *10::npr-10::GFP, punc-122::RFP]*).

475 JSR103 animals were injected with a linear fusion product (*pfrpr-16::frpr-16::SL2::mCherry*  
476 at 25 ng/μL), alongside *punc-122::GFP* (at 50 ng/μL) as a co-injection marker to generate  
477 JSR133 (*frpr-16(gk5305[loxP + pmyo-2::GFP::unc-54 3' UTR + prps-27::neoR::unc-54 3' UTR*  
478 *+ loxP]);him-8(e1489);worEx41[pfrpr-16::frpr-16::SL2::mCherry, punc-122::GFP]*).

479 Injections for JSR81 were generously performed by the Alkema Lab at UMass Medical  
480 School. Injections for JSR119, JSR126, and JSR133 were performed by In Vivo Biosystems  
481 (formerly NemaMetrix).

## 482 **Chemical Compounds**

483 The ascarosides *ascr#3* and *ascr#8* were synthesized as described previously<sup>27,32</sup>. Peptides used  
484 in *in vitro* GPCR activation assays were synthesized by GL Biochem Ltd.

## 485 **Spot Retention Assay**

486 Assays were performed as described previously<sup>13,32</sup>. 50-60 larval-stage 4 (L4) males were  
487 segregated by sex and stored at 20 °C for 5 hours to overnight to be assayed as young adults. For  
488 hermaphrodite trials, young adult hermaphrodites were segregated 1.5 hours prior to testing. 0.6  
489 μL of vehicle control or ascaroside #8 was placed in each scoring region (**Supp. Fig. 1A**). As the  
490 working stock of ascaroside #8 was made in MilliQ-purified ultrapure H<sub>2</sub>O, this was used as the  
491 vehicle control. Five animals were placed on each “X” the assay plate (**Supp. Fig. 1A**), which  
492 was then transferred to a microscope containing a camera and recorded for 20 minutes. Each  
493 strain and sex were assayed over five plates per day on at least three different days.

#### 494 **Single Worm Assay**

495 The outer forty wells of a 48-well suspension culture plate (Olympus Plastics, Cat #: 25-103)  
496 were seeded with 200  $\mu$ L of standard NGM agar. To prepare the plates for the assay, they were  
497 acclimated to room temperature, at which point each well was seeded with 65  $\mu$ L of OP50 *E.*  
498 *coli*. The assay plates were then transferred to a 37 °C incubator with the lid tilted for 4 hours to  
499 allow the bacterial culture to dry on the agar. Once the bacterial culture dried, the lid was  
500 replaced the plate was stored at 20 °C until used in the assay. 50-60 L4 worms were segregated  
501 by sex and stored at 20 °C for 5 hours to overnight to be assayed as young adults. 0.8  $\mu$ L of  
502 either vehicle control or ascaroside #8 was placed in the center of the well corresponding to that  
503 condition within the quadrant being tested, following a random block design (**Fig. 1A**). A single  
504 worm was placed in each of the 10 wells to be assayed, and the plate was transferred to a light  
505 source and camera and recorded for 15 minutes. This process was repeated for all four quadrants.  
506 Each strain and sex were assayed over five plates assayed on at least three different days.

#### 507 **Raw Dwell Time**

508 Raw dwell time values were calculated by subtracting the time a worm exited the cue (center of  
509 the well in spatial controls), from the time it entered, as in the SRA<sup>13</sup>. This was determined per  
510 visit, and the average dwell time was calculated for each animal in the quadrant. Averages of the  
511 four-quadrant means were determined per plate, and a minimum of five plates were assayed per  
512 strain/condition. The mean raw dwell time across five plates was calculated and used for  
513 statistical analyses and graphical display.

#### 514 **Log(fold-change)**

515 The average dwell time in the ascaroside was divided by the average dwell time within the  
516 vehicle control per plate to generate a fold-change. To transform the data, the log of this fold-



517 change was taken, and the average log(fold-change) was used for statistical analyses and  
518 graphical display.

### 519 **Visit Count**

520 The number of visits per worm was calculated, and the average visit count determined per  
521 quadrant, and per plate. The average visit count across five plates was calculated and used for  
522 statistical analyses and graphical display.

### 523 **Percent Attractive Visits**

524 An “attractive visit” was first determined for each plate as any visit greater than two standard  
525 deviations above the mean dwell time within the vehicle control for that plate. Any individual  
526 visit meeting this threshold was scored as a “1”, and any below was scored a “0”. The percent  
527 visits per worm that were attractive was determined, and the average of each quadrant taken. The  
528 four quadrant values were then averaged to generate plate averages. The average percent of  
529 attractive visits across five plates was calculated and used for statistical analyses and graphical  
530 display.

### 531 **Avoidance Assay**

532 Assays were performed as described previously<sup>4,10,40</sup>. 50-60 L4 worms were segregated by sex  
533 and stored at 20 °C for 5 hours to overnight to be assayed as young adults. 1-4 hours prior to the  
534 assay, the lids of unseeded plates were tilted to allow any excess moisture to evaporate off the  
535 plates. At the time of the assay, 10 or more animals were transferred onto each of the dried,  
536 unseeded plates. A drop of either water or 1 μM ascr#8 was placed on the tail of forward moving  
537 animals, and their response was scored as either an avoidance response, or no response. The total  
538 number of avoidances was divided by the total number of drops to generate an avoidance index  
539 for that plate. This was repeated for at least 10 plates over at least three different days.

540 **Statistical Analyses**

541 **Spot Retention Assay**

542 Statistical comparisons within each strain were made by Paired t-tests. For comparisons between  
543 strains/conditions, the data was transformed as described previously<sup>37</sup>. In short, the data was  
544 transformed to have only non-zero data for the calculation of fold-changes. This was done using  
545 a Base 2 Exponentiation ( $2^n$ , where n is equal to the dwell time). The log (base 2) of the fold-  
546 changes of these transformed values was used to allow for direct comparisons between strains of  
547 the same background (i.e., *him-5* and *osm-3;him-5*) using a Student's t-test. *p*-values are defined  
548 in respective figure captions, with thresholds set as: \*  $p < 0.05$ , \*\*  $p < 0.01$ , \*\*\*  $p < 0.001$ , \*\*\*\*  
549  $p < 0.0001$ .

550 **Single Worm Assay**

551 Statistical comparisons within each strain/sex (spatial, vehicle, ascaroside) were made by  
552 Repeated Measured ANOVA with the significance level set at 0.05, followed by multiple  
553 comparisons using Bonferroni correction. For comparisons between strains/sexes, the spatial  
554 control dwell times were compared using a one-way ANOVA followed by a Dunnett's  
555 correction to confirm that mutations of interest had no effect on the amount of time animals  
556 naturally spent in the center of the well. To directly compare strains, a fold-change was  
557 calculated by dividing the ascaroside by vehicle dwell times for each assay. This was then  
558 transformed by taking the log (base 10) of the fold-change. Comparisons were then made by  
559 One-Way ANOVA followed by multiple comparisons using Dunnett's correction. *p*-values are  
560 defined in respective figure captions, with thresholds set as: \*  $p < 0.05$ , \*\*  $p < 0.01$ , \*\*\*  $p <$   
561  $0.001$ , \*\*\*\*  $p < 0.0001$ .

562 **Avoidance Assay**

563 Statistical comparisons within each strain were made by paired t-test against a significance level  
564 set at 0.05. For comparisons between strains/conditions, comparisons were made by One-Way  
565 ANOVA, followed by multiple comparisons using Bonferroni correction. *p*-values are defined in  
566 respective figure captions, with thresholds set as: \* *p* < 0.05, \*\* *p* < 0.01, \*\*\* *p* < 0.001, \*\*\*\* *p*  
567 < 0.0001.

568 ***In vitro* GPCR activation assay**

569 The GPCR activation assay was performed as previously described<sup>69,70</sup>. Briefly, *npr-10* and  
570 *frpr-16* cDNAs were cloned into the pcDNA3.1 TOPO expression vector (Thermo Fisher  
571 Scientific). A CHO-K1 cell line (PerkinElmer, ES-000-A24) stably expressing apo-aequorin  
572 targeted to the mitochondria (mtAEQ) and human Gα16 was transiently transfected with the  
573 receptor cDNA construct or the empty pcDNA3.1 vector using Lipofectamine LTX and Plus  
574 reagent (Thermo Fisher Scientific). Cells were shifted to 28°C one day later and allowed to  
575 incubate for 24 h. On the day of the assay, cells were collected in BSA medium (DMEM/Ham's  
576 F12 with 15 mM HEPES, without phenol red, 0.1% BSA) and loaded with 5 mM coelenterazine  
577 h (Thermo Fisher Scientific) for 4 h at room temperature. The incubated cells were then added to  
578 synthetic peptides dissolved in DMEM/BSA, and luminescence was measured for 30 s at 496 nm  
579 using a Mithras LB940 (Berthold Technologies) or MicroBeta LumiJet luminometer  
580 (PerkinElmer). After 30 s of readout, 0.1 % triton X-100 was added to lyse the cells, resulting in  
581 a maximal calcium response that was measured for 10 s. After initial screening, concentration-  
582 response curves were constructed for HPLC-purified FLP-3 peptides by subjecting the  
583 transfected cells to each peptide in a concentration range from 1 pM to 10 μM. Cells transfected  
584 with an empty vector were used as a negative control. Assays were performed in triplicate on at

585 least two independent days. Concentration-response curves were fitted using Prism v. 7  
586 (nonlinear regression analysis with a sigmoidal concentration-response equation).

### 587 **Generation of a Null *frpr-16* Mutant by CRISPR Mutagenesis**

588 The *frpr-16* CRISPR/Cas9 knockout was provided by the Vancouver node of the International *C.*  
589 *elegans* Consortium. The mutation was generated following previously described techniques<sup>55</sup>.  
590 In short, a 1685 bp region containing the coding sequence, as well 52 bp upstream and 60 bp  
591 downstream, was removed from the genome, and replaced with a trackable cassette containing  
592 *pmyo-2::GFP* and a neomycin resistance gene (**Fig 5A, B**). The flanking sequences of the  
593 mutated sequence are TCATAATTGTTTGTGGACAAAAACCGGGA and  
594 GGTGGAAACGGAAATGAAAGAAAAACCGA. PCR confirmation of gene replacement  
595 with cassette was performed via four sets of PCR reactions checking the upstream insertion site  
596 and the downstream insertion site in the mutant strain, and a test for wild-type sequence in both  
597 mutant and wild-type strains. A band is present on the gel in wild-type samples, with no band  
598 present in the mutant, as a primer sequence is removed with the cassette insertion.

599 See **Supp. Table 3** for primer sequences.

### 600 **Peptide Rescue**

601 SCRAMBLE control or FLP-3 peptide constructs were grown overnight in LB media containing  
602 50 µg/µL ampicillin at 37 °C and diluted to an OD<sub>600</sub> of 1.0 prior to seeding on NGM plates  
603 containing 50 µg/µL ampicillin and 1 mM IPTG. The 75 µL lawn was left to dry and grow  
604 overnight at room temperature before 3 L4 animals were placed on the plates. Males were  
605 selected for testing in the same manner as described above but were isolated onto plates also  
606 seeded with the same peptide on which they had been reared. Animals were then assayed using  
607 either the Avoidance Assay or Single Worm Assay.

608 **Imaging**

609 Animals were mounted on a 2% agar pad and paralyzed using 1 M sodium azide on a  
610 microscope slide, as described previously<sup>10</sup>.

611 Images for amphid *flp-3* expression were acquired using a Zeiss LSM700 confocal  
612 microscope. Final images were obtained using a 63x oil objective with a 1.4x digital zoom, for a  
613 final magnification of ~90X. Tail images were acquired using a Zeiss Apotome using a 40x oil  
614 objective.

615 Images of *npr-10* and *frpr-16* expression were acquired using a Zeiss LSM510 Meta inverted  
616 confocal microscope. Final images of *npr-10* were obtained using a 63x oil objective with a 0.8x  
617 digital zoom, for a final magnification of ~50X. Final images of *frpr-16* were obtained at either  
618 20x (air objective) or 63x (oil) with a 2x digital zoom, for a final magnification of ~125x.

619

620

621 **References**

- 622 1 García, L. R. & Portman, D. S. Neural circuits for sexually dimorphic and sexually  
623 divergent behaviors in *Caenorhabditis elegans*. *Curr Opin Neurobiol* **38**, 46-52,  
624 doi:10.1016/j.conb.2016.02.002 (2016).
- 625 2 Li, Y. & Dulac, C. Neural coding of sex-specific social information in the mouse brain.  
626 *Current Opinion in Neurobiology* **53**, 120-130, doi:10.1016/j.conb.2018.07.005 (2018).
- 627 3 Yang, T. & Shah, N. M. Molecular and neural control of sexually dimorphic social  
628 behaviors. *Current opinion in neurobiology* **38**, 89-95, doi:10.1016/j.conb.2016.04.015  
629 (2016).
- 630 4 Chute, C. D. & Srinivasan, J. Chemical mating cues in *C. elegans*. *Semin Cell Dev Biol*  
631 **33**, 18-24, doi:10.1016/j.semcd.2014.06.002 (2014).
- 632 5 Kaba, H., Fujita, H., Agatsuma, T. & Matsunami, H. Maternally inherited peptides as  
633 strain-specific chemosignals. *Proc Natl Acad Sci U S A*, doi:10.1073/pnas.2014712117  
634 (2020).
- 635 6 McGrath, P. T. & Ruvinsky, I. A primer on pheromone signaling in *Caenorhabditis*  
636 *elegans* for systems biologists. *Current opinion in systems biology* **13**, 23-30,  
637 doi:10.1016/j.coisb.2018.08.012 (2019).
- 638 7 Silva, L. & Antunes, A. Vomeronasal Receptors in Vertebrates and the Evolution of  
639 Pheromone Detection. *Annual review of animal biosciences* **5**, 353-370,  
640 doi:10.1146/annurev-animal-022516-022801 (2017).
- 641 8 Flavell, S. W., Raizen, D. M. & You, Y.-J. Behavioral States. *Genetics* **216**, 315-332,  
642 doi:10.1534/genetics.120.303539 (2020).

- 643 9 Ghosh, D. D. *et al.* Neural Architecture of Hunger-Dependent Multisensory Decision  
644 Making in *C. elegans*. *Neuron* **92**, 1049-1062, doi:10.1016/j.neuron.2016.10.030 (2016).
- 645 10 Chute, C. D. *et al.* Co-option of neurotransmitter signaling for inter-organismal  
646 communication in *C. elegans*. *Nat Commun* **10**, 3186, doi:10.1038/s41467-019-11240-7  
647 (2019).
- 648 11 Barr, M. M., García, L. R. & Portman, D. S. Sexual Dimorphism and Sex Differences in  
649 *Caenorhabditis elegans* Neuronal Development and Behavior. *Genetics* **208**, 909-935,  
650 doi:10.1534/genetics.117.300294 (2018).
- 651 12 Virk, B. *et al.* Folate Acts in *E. coli* to Accelerate *C. elegans* Aging Independently of  
652 Bacterial Biosynthesis. *Cell Rep* **14**, 1611-1620, doi:10.1016/j.celrep.2016.01.051 (2016).
- 653 13 Narayan, A. *et al.* Contrasting responses within a single neuron class enable sex-specific  
654 attraction in *Caenorhabditis elegans*. *Proc Natl Acad Sci U S A* **113**, E1392-1401,  
655 doi:10.1073/pnas.1600786113 (2016).
- 656 14 Aprison, E. Z. & Ruvinsky, I. Counteracting Ascarosides Act through Distinct Neurons  
657 to Determine the Sexual Identity of *C. elegans* Pheromones. *Curr Biol* **27**, 2589-  
658 2599.e2583, doi:10.1016/j.cub.2017.07.034 (2017).
- 659 15 Fagan, K. A. *et al.* A Single-Neuron Chemosensory Switch Determines the Valence of a  
660 Sexually Dimorphic Sensory Behavior. *Curr Biol* **28**, 902-914.e905,  
661 doi:10.1016/j.cub.2018.02.029 (2018).
- 662 16 Jang, H. *et al.* Neuromodulatory state and sex specify alternative behaviors through  
663 antagonistic synaptic pathways in *C. elegans*. *Neuron* **75**, 585-592,  
664 doi:10.1016/j.neuron.2012.06.034 (2012).

- 665 17 Barrios, A., Ghosh, R., Fang, C., Emmons, S. W. & Barr, M. M. PDF-1 neuropeptide  
666 signaling modulates a neural circuit for mate-searching behavior in *C. elegans*. *Nature*  
667 *Neuroscience* **15**, 1675-1684, doi:10.1038/nn.3253 (2012).
- 668 18 Chen, D., Taylor, K. P., Hall, Q. & Kaplan, J. M. The Neuropeptides FLP-2 and PDF-1  
669 Act in Concert To Arouse *Caenorhabditis elegans* Locomotion. *Genetics* **204**, 1151-  
670 1159, doi:10.1534/genetics.116.192898 (2016).
- 671 19 Hilbert, Z. A. & Kim, D. H. PDF-1 neuropeptide signaling regulates sexually dimorphic  
672 gene expression in shared sensory neurons of *C. elegans*. *eLife* **7**, e36547,  
673 doi:10.7554/eLife.36547 (2018).
- 674 20 Ryu, L. *et al.* Feeding state regulates pheromone-mediated avoidance behavior via the  
675 insulin signaling pathway in *Caenorhabditis elegans*. *The EMBO journal* **37**, e98402,  
676 doi:10.15252/emj.201798402 (2018).
- 677 21 Liu, T., Kim, K., Li, C. & Barr, M. M. FMRFamide-like neuropeptides and  
678 mechanosensory touch receptor neurons regulate male sexual turning behavior in  
679 *Caenorhabditis elegans*. *J Neurosci* **27**, 7174-7182, doi:10.1523/JNEUROSCI.1405-  
680 07.2007 (2007).
- 681 22 Li, C. & Kim, K. Family of FLP Peptides in *Caenorhabditis elegans* and Related  
682 Nematodes. *Front Endocrinol (Lausanne)* **5**, 150, doi:10.3389/fendo.2014.00150 (2014).
- 683 23 Hung, W. L. *et al.* Attenuation of insulin signalling contributes to FSN-1-mediated  
684 regulation of synapse development. *The EMBO Journal* **32**, 1745-1760,  
685 doi:10.1038/emboj.2013.91 (2013).



- 686 24 Leinwand, S. G. & Chalasani, S. H. Neuropeptide signaling remodels chemosensory  
687 circuit composition in *Caenorhabditis elegans*. *Nature neuroscience* **16**, 1461-1467,  
688 doi:10.1038/nn.3511 (2013).
- 689 25 Bhardwaj, A., Thapliyal, S., Dahiya, Y. & Babu, K. FLP-18 Functions through the G-  
690 Protein-Coupled Receptors NPR-1 and NPR-4 to Modulate Reversal Length in  
691 *Caenorhabditis elegans*. *The Journal of Neuroscience* **38**, 4641,  
692 doi:10.1523/JNEUROSCI.1955-17.2018 (2018).
- 693 26 Yu, Y., Zhi, L., Guan, X., Wang, D. & Wang, D. FLP-4 neuropeptide and its receptor in a  
694 neuronal circuit regulate preference choice through functions of ASH-2 trithorax complex  
695 in *Caenorhabditis elegans*. *Sci Rep* **6**, 21485, doi:10.1038/srep21485 (2016).
- 696 27 Pungaliya, C. *et al.* A shortcut to identifying small molecule signals that regulate  
697 behavior and development in *Caenorhabditis elegans*. *Proceedings of the National*  
698 *Academy of Sciences of the United States of America* **106**, 7708-7713,  
699 doi:10.1073/pnas.0811918106 (2009).
- 700 28 Iannacone, M. J. *et al.* The RFamide receptor DMSR-1 regulates stress-induced sleep in  
701 *C. elegans*. *Elife* **6**, doi:10.7554/eLife.19837 (2017).
- 702 29 Beets, I. *et al.* Natural Variation in a Dendritic Scaffold Protein Remodels Experience-  
703 Dependent Plasticity by Altering Neuropeptide Expression. *Neuron*, S0896-  
704 6273(0819)30849-30849, doi:10.1016/j.neuron.2019.10.001 (2019).
- 705 30 Hussey, R. *et al.* Oxygen-sensing neurons reciprocally regulate peripheral lipid  
706 metabolism via neuropeptide signaling in *Caenorhabditis elegans*. *PLoS genetics* **14**,  
707 e1007305-e1007305, doi:10.1371/journal.pgen.1007305 (2018).

- 708 31 Ringstad, N. & Horvitz, H. R. FMRFamide neuropeptides and acetylcholine  
709 synergistically inhibit egg-laying by *C. elegans*. *Nat Neurosci* **11**, 1168-1176,  
710 doi:10.1038/nn.2186 (2008).
- 711 32 Srinivasan, J. *et al.* A blend of small molecules regulates both mating and development in  
712 *Caenorhabditis elegans*. *Nature* **454**, 1115-1118, doi:10.1038/nature07168 (2008).
- 713 33 Kim, K. & Li, C. Expression and regulation of an FMRFamide-related neuropeptide gene  
714 family in *Caenorhabditis elegans*. *J Comp Neurol* **475**, 540-550, doi:10.1002/cne.20189  
715 (2004).
- 716 34 Fenk, L. A. & de Bono, M. Memory of recent oxygen experience switches pheromone  
717 valence in *Caenorhabditis elegans*. *Proceedings of the National Academy of Sciences*  
718 **114**, 4195, doi:10.1073/pnas.1618934114 (2017).
- 719 35 Rengarajan, S., Yankura, K. A., Guillermin, M. L., Fung, W. & Hallem, E. A. Feeding  
720 state sculpts a circuit for sensory valence in *Caenorhabditis elegans*. *Proceedings of the*  
721 *National Academy of Sciences* **116**, 1776, doi:10.1073/pnas.1807454116 (2019).
- 722 36 Xu, J. *et al.* Feeding recombinant *E. coli* with GST-mBmKTX fusion protein increases  
723 the fecundity and lifespan of *Caenorhabditis elegans*. *Peptides* **89**, 1-8,  
724 doi:10.1016/j.peptides.2017.01.003 (2017).
- 725 37 Zhang, Y. K., Reilly, D. K., Yu, J., Srinivasan, J. & Schroeder, F. C. Photoaffinity probes  
726 for nematode pheromone receptor identification. *Journal of Organic & Biomolecular*  
727 *Chemistry*, 10.1039/c1039ob02099c, doi:10.1039/c9ob02099c (2019).
- 728 38 Reilly, D. K., Lawler, D. E., Albrecht, D. R. & Srinivasan, J. Using an Adapted  
729 Microfluidic Olfactory Chip for the Imaging of Neuronal Activity in Response to

- 730 Pheromones in Male *C. Elegans* Head Neurons. *Journal of Visualized Experiments*,  
731 e56026, doi:doi:10.3791/56026 (2017).
- 732 39 Greene, J. S. *et al.* Balancing selection shapes density-dependent foraging behaviour.  
733 *Nature* **539**, 254-258, doi:10.1038/nature19848 (2016b).
- 734 40 Hilliard, M. A., Bergamasco, C., Arbucci, S., Plasterk, R. H. A. & Bazzicalupo, P.  
735 Worms taste bitter: ASH neurons, QUI-1, GPA-3 and ODR-3 mediate quinine avoidance  
736 in *Caenorhabditis elegans*. *The EMBO Journal* **23**, 1101-1111,  
737 doi:10.1038/sj.emboj.7600107 (2004).
- 738 41 Chang, Y.-J. *et al.* Modulation of Locomotion and Reproduction by FLP Neuropeptides  
739 in the Nematode *Caenorhabditis elegans*. *PLoS ONE* **10**, e0135164,  
740 doi:10.1371/journal.pone.0135164 (2015).
- 741 42 Yemini, E., Jucikas, T., Grundy, L. J., Brown, A. E. X. & Schafer, W. R. A database of  
742 *Caenorhabditis elegans* behavioral phenotypes. *Nature Methods* **10**, 877-879,  
743 doi:10.1038/nmeth.2560 (2013).
- 744 43 Macosko, E. Z. *et al.* A Hub-and-Spoke Circuit Drives Pheromone Attraction and Social  
745 Behavior in *C. elegans*. *Nature* **458**, 1171-1175, doi:10.1038/nature07886 (2009).
- 746 44 Jiang, L. I. & Sternberg, P. W. An HMG1-like protein facilitates Wnt signaling in  
747 *Caenorhabditis elegans*. *Genes Dev* **13**, 877-889 (1999).
- 748 45 Puckett Robinson, C., Schwarz, E. M. & Sternberg, P. W. Identification of DVA  
749 interneuron regulatory sequences in *Caenorhabditis elegans*. *PLoS One* **8**, e54971,  
750 doi:10.1371/journal.pone.0054971 (2013).

- 751 46 Laurent, P. *et al.* Genetic dissection of neuropeptide cell biology at high and low activity  
752 in a defined sensory neuron. *Proceedings of the National Academy of Sciences* **115**,  
753 E6890, doi:10.1073/pnas.1714610115 (2018).
- 754 47 Taylor, S. R. *et al.* Expression profiling of the mature *C. elegans* nervous system by  
755 single-cell RNA-Sequencing. *bioRxiv*, 737577, doi:10.1101/737577 (2019).
- 756 48 Sulston, J. E., Albertson, D. G. & Thomson, J. N. The *Caenorhabditis elegans* male:  
757 postembryonic development of nongonadal structures. *Dev Biol* **78**, doi:10.1016/0012-  
758 1606(80)90352-8 (1980).
- 759 49 Peden, E., Kimberly, E., Gengyo-Ando, K., Mitani, S. & Xue, D. Control of sex-specific  
760 apoptosis in *C. elegans* by the BarH homeodomain protein CEH-30 and the  
761 transcriptional repressor UNC-37/Groucho. *Genes Dev* **21**, 3195-3207,  
762 doi:10.1101/gad.1607807 (2007).
- 763 50 Van Bael, S. *et al.* A *Caenorhabditis elegans* Mass Spectrometric Resource for  
764 Neuropeptidomics. *Journal of The American Society for Mass Spectrometry*,  
765 doi:10.1007/s13361-017-1856-z (2018).
- 766 51 Husson, S. J., Clynen, E., Baggerman, G., Janssen, T. & Schoofs, L. Defective processing  
767 of neuropeptide precursors in *Caenorhabditis elegans* lacking proprotein convertase 2  
768 (KPC-2/EGL-3): mutant analysis by mass spectrometry. *J Neurochem* **98**, 1999-2012,  
769 doi:10.1111/j.1471-4159.2006.04014.x (2006).
- 770 52 Thacker, C., Srayko, M. & Rose, A. M. Mutational analysis of *bli-4/kpc-4* reveals critical  
771 residues required for proprotein convertase function in *C. elegans*. *Gene* **252**, 15-25,  
772 doi:10.1016/s0378-1119(00)00211-0 (2000).

- 773 53 Cardoso, J., Felix, R., Fonseca, V. & Power, D. Feeding and the Rhodopsin Family G-  
774 Protein Coupled Receptors in Nematodes and Arthropods. *Frontiers in Endocrinology* **3**,  
775 doi:10.3389/fendo.2012.00157 (2012).
- 776 54 Beets, I., Lindemans, M., Janssen, T. & Verleyen, P. Deorphanizing G protein-coupled  
777 receptors by a calcium mobilization assay. *Methods Mol Biol* **789**, 377-391,  
778 doi:10.1007/978-1-61779-310-3\_25 (2011).
- 779 55 Au, V. *et al.* CRISPR/Cas9 Methodology for the Generation of Knockout Deletions in  
780 *Caenorhabditis elegans*. *G3 (Bethesda, Md.)* **9**, 135-144, doi:10.1534/g3.118.200778  
781 (2019).
- 782 56 Bentley, B. *et al.* The Multilayer Connectome of *Caenorhabditis elegans*. *PLoS*  
783 *computational biology* **12**, e1005283, doi:10.1371/journal.pcbi.1005283 (2016).
- 784 57 Gulia-Nuss, M., Robertson, A. E., Brown, M. R. & Strand, M. R. Insulin-like peptides  
785 and the target of rapamycin pathway coordinately regulate blood digestion and egg  
786 maturation in the mosquito *Aedes aegypti*. *PLoS One* **6**, e20401,  
787 doi:10.1371/journal.pone.0020401 (2011).
- 788 58 Dhara, A. *et al.* Ovary ecdysteroidogenic hormone functions independently of the insulin  
789 receptor in the yellow fever mosquito, *Aedes aegypti*. *Insect Biochem Mol Biol* **43**, 1100-  
790 1108, doi:10.1016/j.ibmb.2013.09.004 (2013).
- 791 59 Terrill, S. J. *et al.* Nucleus accumbens melanin-concentrating hormone signaling  
792 promotes feeding in a sex-specific manner. *Neuropharmacology* **178**, 108270,  
793 doi:10.1016/j.neuropharm.2020.108270 (2020).

- 794 60 Tonoki, A., Ogasawara, M., Yu, Z. & Itoh, M. Appetitive Memory with Survival Benefit  
795 Is Robust Across Aging in *Drosophila*. *J Neurosci* **40**, 2296-2304,  
796 doi:10.1523/jneurosci.2045-19.2020 (2020).
- 797 61 Rojo Romanos, T., Petersen, J. G., Riveiro, A. R. & Pocock, R. A novel role for the zinc-  
798 finger transcription factor EGL-46 in the differentiation of gas-sensing neurons in  
799 *Caenorhabditis elegans*. *Genetics* **199**, 157-163, doi:10.1534/genetics.114.172049  
800 (2015).
- 801 62 Chew, Y. L., Grundy, L. J., Brown, A. E. X., Beets, I. & Schafer, W. R. Neuropeptides  
802 encoded by *nlp-49* modulate locomotion, arousal and egg-laying behaviours in  
803 *Caenorhabditis elegans* via the receptor SEB-3. *Philos Trans R Soc Lond B Biol Sci* **373**,  
804 doi:10.1098/rstb.2017.0368 (2018).
- 805 63 Fadda, M. *et al.* NPY/NPF-Related Neuropeptide FLP-34 Signals from Serotonergic  
806 Neurons to Modulate Aversive Olfactory Learning in *Caenorhabditis elegans*. *The*  
807 *Journal of Neuroscience* **40**, 6018, doi:10.1523/JNEUROSCI.2674-19.2020 (2020).
- 808 64 Fadda, M. *et al.* Regulation of Feeding and Metabolism by Neuropeptide F and Short  
809 Neuropeptide F in Invertebrates. *Frontiers in endocrinology* **10**, 64-64,  
810 doi:10.3389/fendo.2019.00064 (2019).
- 811 65 Hobert, O. The neuronal genome of *Caenorhabditis elegans*. *WormBook*, 1-106,  
812 doi:10.1895/wormbook.1.161.1 (2013).
- 813 66 Nelson, M. D. *et al.* FRPR-4 Is a G-Protein Coupled Neuropeptide Receptor That  
814 Regulates Behavioral Quiescence and Posture in *Caenorhabditis elegans*. *PLoS One* **10**,  
815 e0142938, doi:10.1371/journal.pone.0142938 (2015).

- 816 67 Park, D. *et al.* Interaction of structure-specific and promiscuous G-protein-coupled  
817 receptors mediates small-molecule signaling in *Caenorhabditis elegans*. *PNAS* **109**,  
818 9917-9922, doi:10.1073/pnas.1202216109 (2012).
- 819 68 Cook, S. J. *et al.* Whole-animal connectomes of both *Caenorhabditis elegans* sexes.  
820 *Nature* **571**, 63-71, doi:10.1038/s41586-019-1352-7 (2019).
- 821 69 Van Sinay, E. *et al.* Evolutionarily conserved TRH neuropeptide pathway regulates  
822 growth in *Caenorhabditis elegans*. *Proc Natl Acad Sci U S A* **114**, E4065-e4074,  
823 doi:10.1073/pnas.1617392114 (2017).
- 824 70 Peymen, K. *et al.* Myoinhibitory peptide signaling modulates aversive gustatory learning  
825 in *Caenorhabditis elegans*. *PLoS Genet* **15**, e1007945, doi:10.1371/journal.pgen.1007945  
826 (2019).

827

828

829 **Acknowledgements**

830 We thank the *Caenorhabditis* Genetics Center, which is funded by the NIH Office of Research  
831 Infrastructure Programs (P40 OD01044), as well as Dr. Paul Sternberg (CalTech), Dr. Chris Li  
832 (CUNY), the National BioResource Project, Dr. Ding Xue (UC Boulder), and Dr. Maureen Barr  
833 (Rutgers) for providing strains. The synthetic ascr#8 utilized in this study was generously  
834 provided by Frank Schroeder (Cornell University). We want to thank Dr. Don Moerman (UBC;  
835 *C. elegans* Knockout Facility) for providing the *frpr-16* knockout. We thank InVivo Biosciences  
836 for generating transgenic animals by injection. We thank Kate Pearce and Suzanne Scarlatta for  
837 assistance in confocal fluorescent imaging the *npr-10* and *frpr-16* reporter strains, as well as Dr.  
838 Jeremy Florman of Mark Alkema's lab for assistance in *flp-3* reporter imaging. We also would  
839 like to thank Dr. Victor Ambros (UMass Medical School), Dr. Shreekanth Chalasani (Salk  
840 Institute), Dr. Josh Hawk (Yale), and Dr. Dominic Esposito (Addgene) for providing us with the  
841 necessary plasmid reagents. We acknowledge and thank Profs. Frank Schroeder and Shreekanth  
842 Chalasani, as well as members of the Srinivasan lab for their feedback on this manuscript.  
843 Funding for this work was provided under the Research foundation Flanders (FWO) project  
844 grant G0C0618N (I.B.), and the National Institutes of Health grants R01 NS107475 (M.J.A.),  
845 and R01 DC016058-01 (J.S.).

846 **Competing interests**

847 No competing interests are declared.

848 **Author contributions**

849 D.K.R. performed behavioral assays, contributed to the single worm assay design, performed all  
850 molecular biology, performed and designed peptide rescue experiments, performed the statistical  
851 analyses, and led manuscript writing and revision. E.J.M., H.T.N., and A.N.R contributed to the



852 behavioral assays and as well as manuscript revisions. E.V. and I.B. performed the GPCR  
853 activation assays, as well as contributed to manuscript revisions. I.B. also provided funding for  
854 the GPCR activation studies. W.J. contributed to injections of the *flp-3* rescue, while M.J.A.  
855 provided comments on manuscript. R.J.G. assisted in the development of the single worm assay  
856 design, J.S. and D.K.R. wrote the manuscript with input from M.A., R.J.G.

857 **Figure Legends**

858

859 **Figure 1. Attraction to *ascr#8* is sex specific.** (A) Design of the Single Worm Attraction Assay  
860 (SWAA). The outer 40 wells of a 48-well suspension cell culture plate are seeded with NGM  
861 agar and a thin lawn of OP50 *E. coli*. A random block design results in spatial control (light  
862 grey), vehicle control (dark grey), and ascaroside (purple) containing wells. Quadrants are  
863 recorded for 15 minutes. (Inset) The structure of *ascr#8*. (B) Raw dwell times of males of control  
864 lines in SWAA. (C) Transformed log(fold-change) of male dwell time data. (D) Raw dwell time  
865 and (E) log(fold-change) of hermaphrodites across strains. Light grey denotes spatial controls  
866 (“S”) (when applicable), dark grey denotes vehicle controls (“V”) , colors denote *ascr#8* values  
867 (“A”) (N2, blue; *him-5*, red; *him-8*, purple; *osm-3;him-5*, orange). For all figures: Error bars  
868 denote SEM.  $n \geq 5$ . \*  $p < 0.05$ , \*\*  $p < 0.01$ , \*\*\*  $p < 0.001$ , \*\*\*\*  $p < 0.0001$ , unless denoted  
869 otherwise. For **1B**: +++++  $p < 0.0001$ , vehicle vs. spatial control.

870

871

872 **Figure 2. Peptidergic regulation of the male behavioral response to ascr#8.** (A, B) A screen  
873 of neuropeptide defective mutants. (A) Raw dwell time and (B) log(fold-change) values. (C)  
874 Avoidance assay comparing *him-8* and *flp-3* males. (D) Hermaphroditic raw dwell time and (E)  
875 log(fold-change) values in response to ascr#8. (F) Hermaphroditic *him-8* and *flp-3* ascr#8  
876 avoidance. (G-I) Effect of expressing *flp-3* under its endogenous promoter on both attractive  
877 behavior (G) raw dwell times and (H) log(fold-change) values, as well as (I) the avoidance  
878 phenotype. (J-L) Expression of *pflp-3::flp-3::mCherry* within the male tail, co-localizing with  
879 *gpa-1::GFP* in the SPD spicule neurons (arrows). \* denotes coelomocyte accumulation of GFP.  
880 (J) GFP, (K) mCherry, (L) merged image at ~90X magnification. In panel (H),  $\diamond\diamond$ ,  $p < 0.01$  for  
881 *flp-3* mutant versus transgenic rescue.

882

883

884

885 **Figure 3. The G protein-coupled Receptor, NPR-10, is required for the male behavioral**  
886 **response to ascr#8. (A)** Previously identified FLP-3 peptide affinities for known receptors.  
887 Adapted from Li and Kim, 2014<sup>22</sup>. **(B)** Raw dwell time and **(C)** log(fold-change) values for *npr*  
888 receptor mutants and *npr-10* rescue in the SWAA. **(D)** Avoidance indexes of *npr* receptor  
889 mutants and rescue. **(E)** Localization of *pnpr-10::npr-10::GFP* in the amphid region of the male  
890 head. Localization includes the inner labial neurons, IL2, and their respective socket cells (ILso),  
891 the interneurons RMEV and RMEL, the chemosensory neurons ADL and ASG, as well as the  
892 interneurons AVF and AVK. **(F)** Expression of *pnpr-10::npr-10::GFP* in the mail tail.  
893 Localization is observed in the B-class Ray neurons.

894

895

896 **Figure. 4. FLP-3 peptides activate the G protein-coupled receptors, NPR-10 and FRPR-16,**

897 *in vitro*. Dose response curves of (A) FLP-3-1, (B) FLP-3-2, (C) FLP-3-3, (D) FLP-3-4, (E)

898 FLP-3-5, (F) FLP-3-7, (G) FLP-3-8, (H) and FLP-3-9 for activation of NPR-10B (blue circles)

899 and FRPR-16 (red triangles). Peptides FLP-3-6 and FLP-3-10 did not activate either receptor. (I)

900 EC<sub>50</sub> values and 95% Confidence Intervals for FLP-3 peptide activating NPR-10B and FRPR-16.

901 (A-H) Error bars denote SEM. n ≥ 6.

902

903

904 **Figure 5. FRPR-16 is required for the male behavioral response to ascr#8.** (A, B) Design of  
905 CRISPR/Cas9-mediated *frpr-16* null mutation. (A) The wild-type gene, with CRISPR cut sites  
906 marked, along with 450 bp homology arm regions. (B) The mutant gene sequence, consisting of  
907 an inverted cassette driving loxP flanked *pmyo-2::GFP* and *prps-27::neoR* expression. (C) Raw  
908 dwell time and (D) log(fold-change) values for *frpr-16 lof* animals, transgenic rescues, and *frpr-*  
909 *16;npr-10* double mutant animals. (E) Avoidance indexes of *frpr-16 lof* animals, transgenic  
910 rescues, and *frpr-16;npr-10* double mutant animals. (F) Expression of *pfrpr-16::frpr-*  
911 *16::SL2::mCherry* in male *C. elegans* at 20X magnification. Localization within the ventral cord  
912 denoted. (F, inset), Amphid localization of *pfrpr-16::frpr-16::SL2::mCherry* at ~120X within the  
913 reverse locomotion command interneurons, AVA, AVE, and AVD, as well as the BAG neuron  
914 (anterior to the nerve ring). In panel (D)  $\diamond\diamond$ ,  $p < 0.01$  for *frpr-16 lof* mutant versus transgenic  
915 rescue.  
916  
917

918

919 **Figure 6. Peptide feeding rescues wild-type behavior and reveals two active peptides within**

920 **the FLP-3 precursor. (A)** Overview of rescue-by-feeding paradigm. **(Top)** the peptide of

921 interest is flanked by EGL-3 cleavage sites, with a 6x-His tag upstream. **(Bottom)** *flp-3 lof*

922 animals are raised on bacteria expressing a FLP-3 peptide of interest and are assayed as young

923 adults. **(B)** Avoidance indexes of *him-8* and *flp-3* animals raised on scramble, FLP-3-1, FLP-3-2,

924 FLP-3-4, FLP-3-9, and FLP-3-10 peptides. **(C)** Raw dwell time and **(D)** log(fold-change) values

925 for *him-8* and *flp-3* animals raised on scramble, FLP-3-2, and FLP-3-9 peptides. Active peptides

926 shown in pink.

927

928

929

930 **Figure 7. Two FLP-3 NP/NPR modules mediate the male behavioral response to ascr#8.**

931 The neuropeptide gene *flp-3* is expressed in the IL1 neurons in the head and the SPD spicule  
932 neurons in the tail (teal). Following release of processed FLP-3 peptides, FLP-3-2 and FLP-3-9  
933 are sensed by NPR-10 and FRPR-16 expressing neurons (blue and red, respectively) to mediate  
934 dwelling in the mating pheromone by modulating forward and reverse locomotion. Green  
935 neurons are connections inferred from the male synaptic connectome <sup>68</sup>. Gold denotes the  
936 command interneuron AVB and the forward locomotory circuitry.



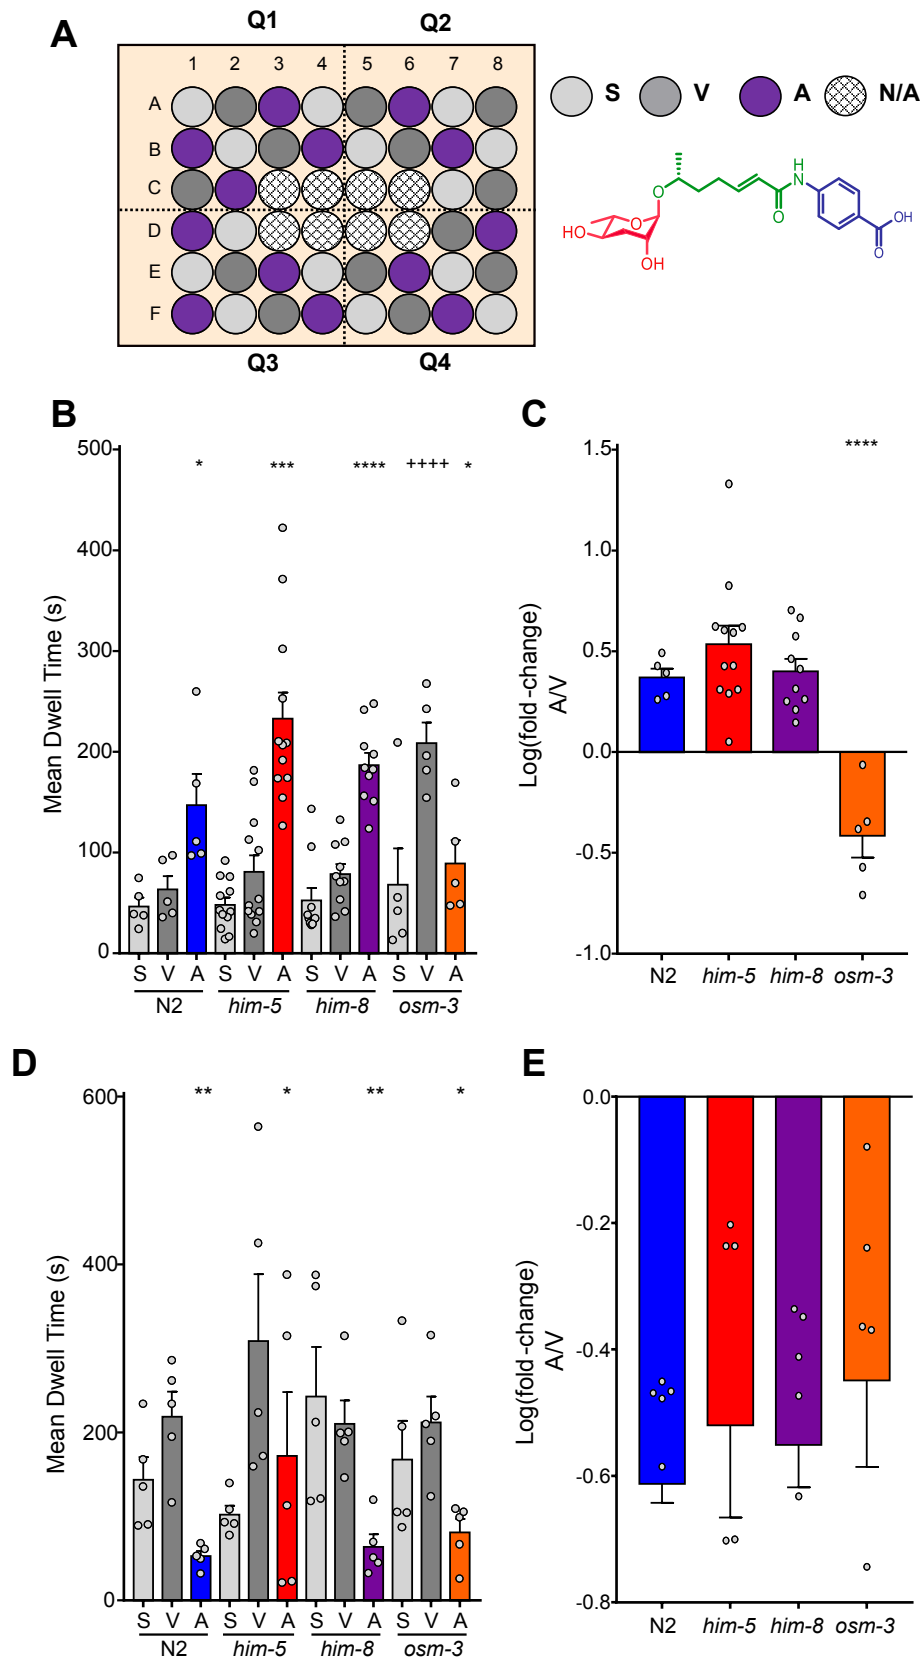

Figure-1

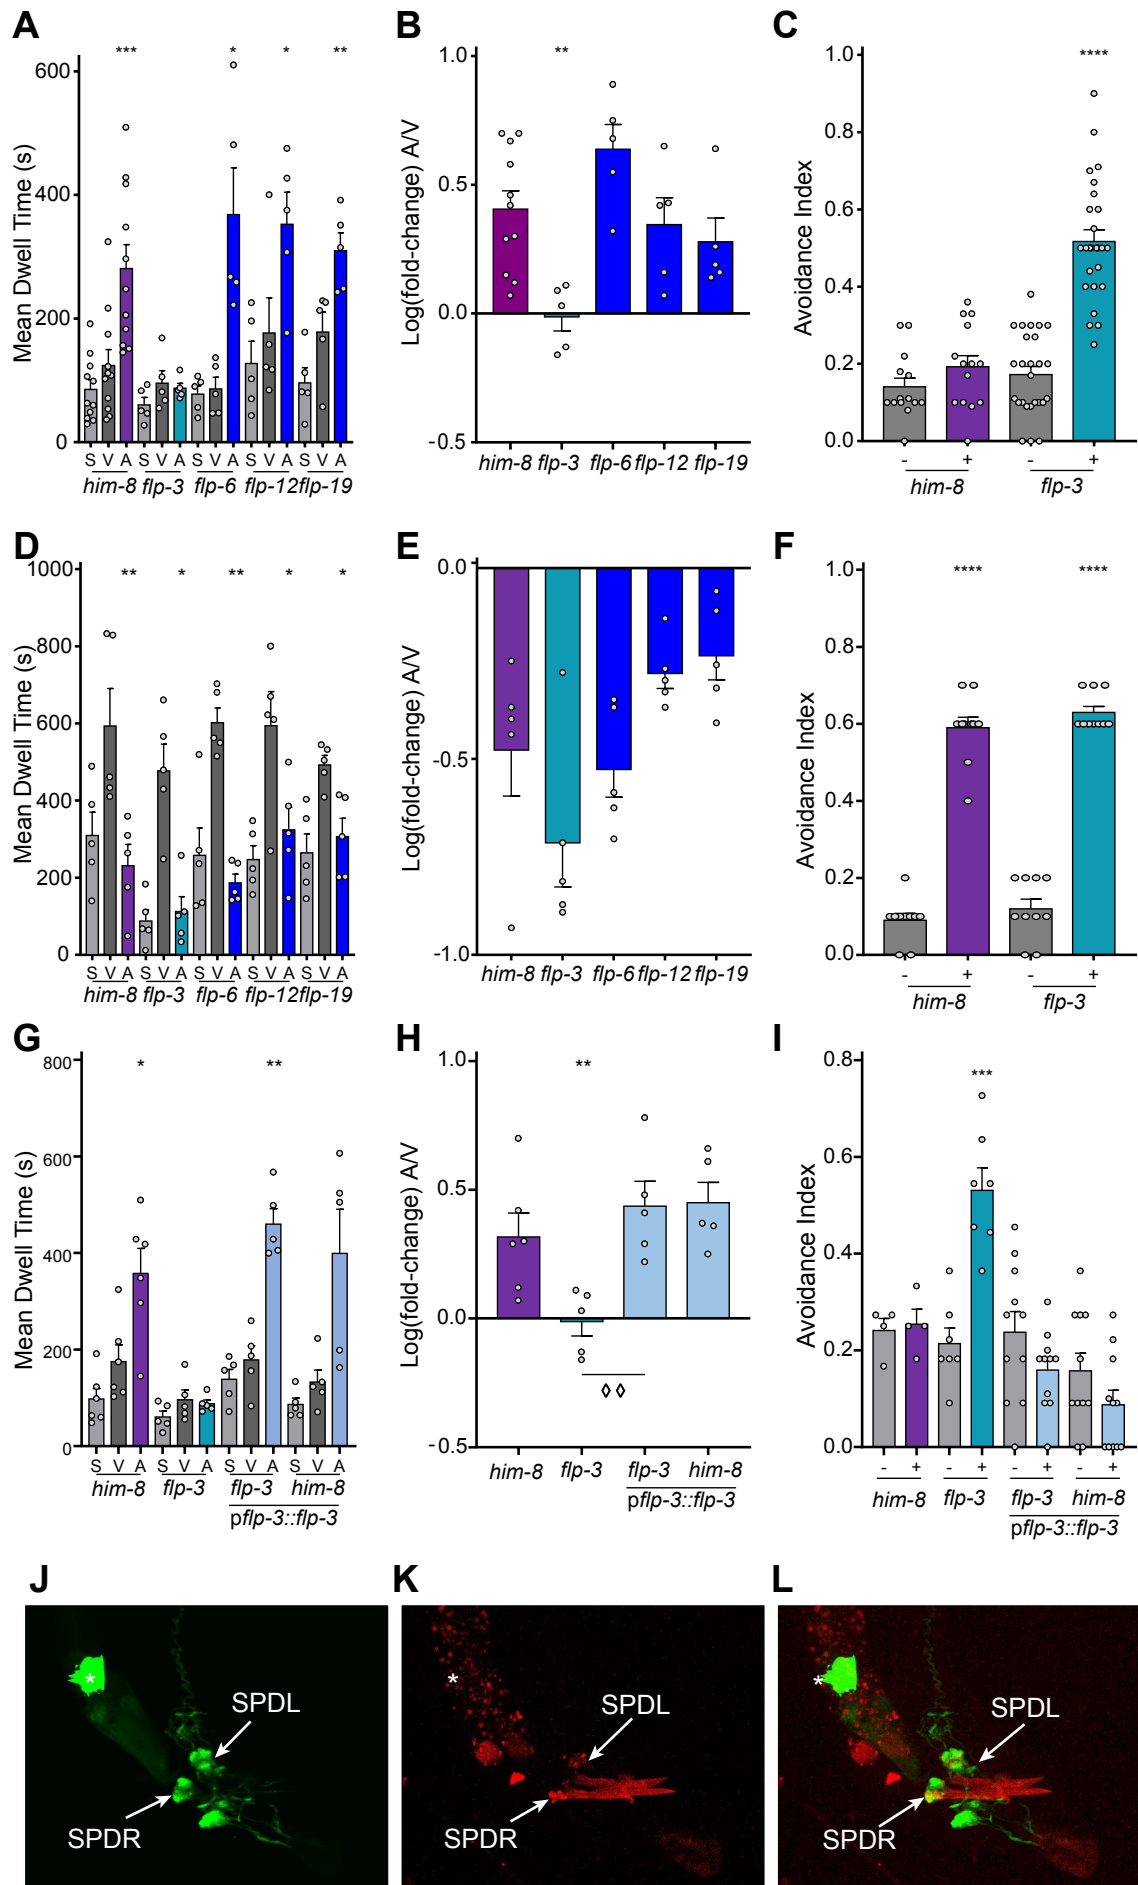

Figure-2

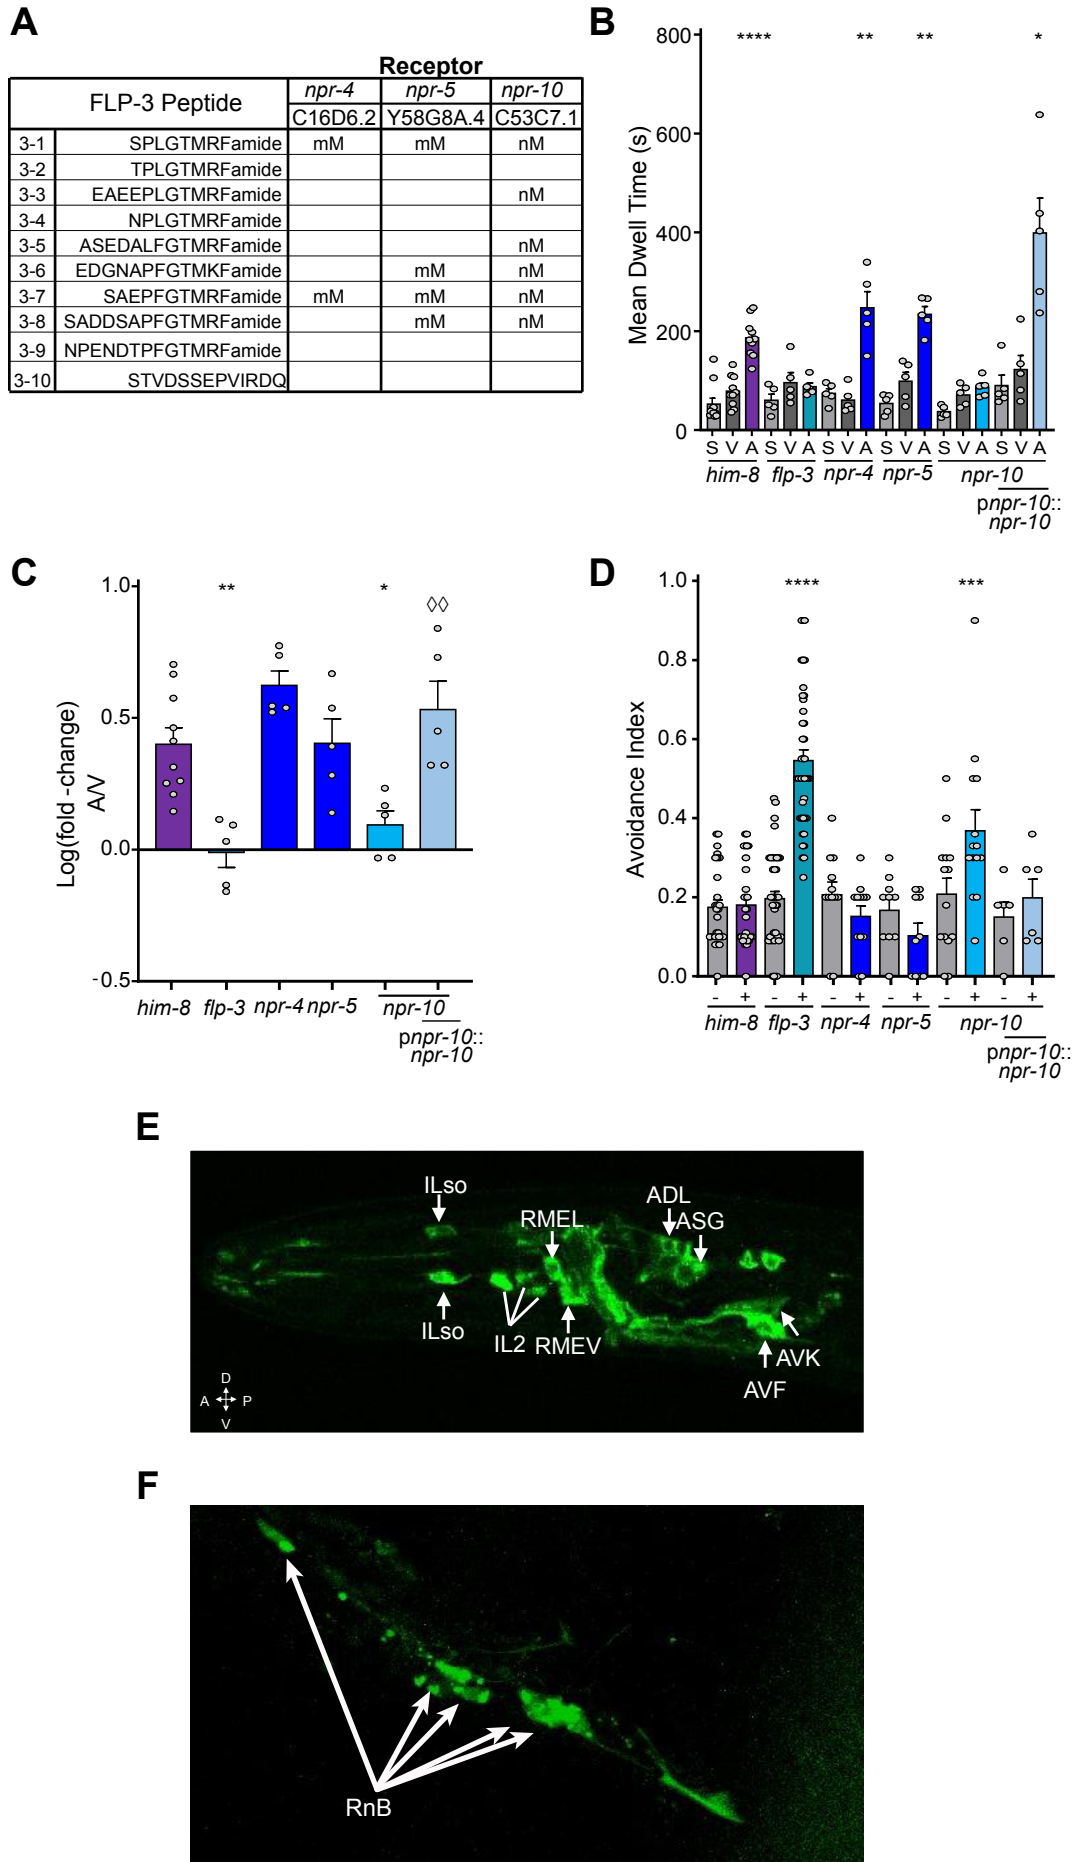

Figure-3

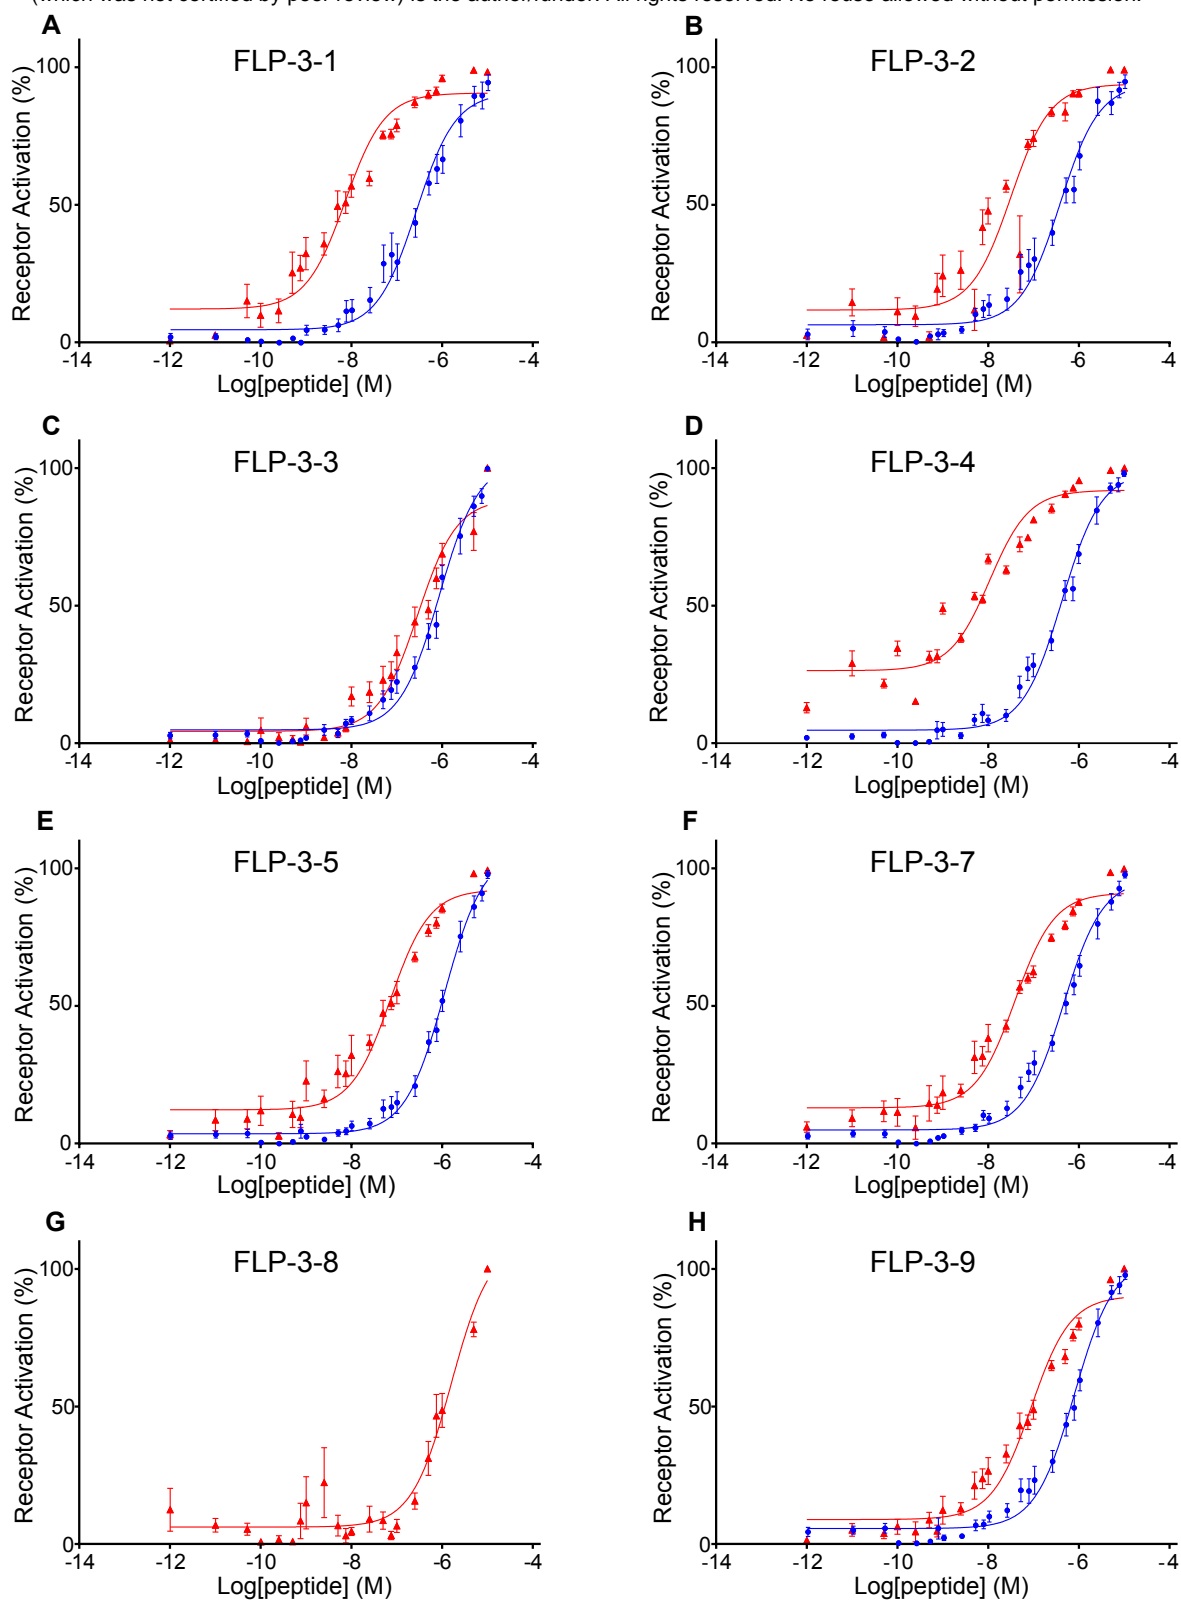

I

|     | FLP-3 Peptide      | NPR-10           |                      | FRPR-16          |                      |
|-----|--------------------|------------------|----------------------|------------------|----------------------|
|     |                    | EC <sub>50</sub> | 95% CI               | EC <sub>50</sub> | 95% CI               |
| 3-1 | SPLGTMRFamide      | 262.1 nM         | 189.7 nM to 359.8 nM | 7.4 nM           | 5.2 nM to 10.6 nM    |
| 3-2 | TPLGTMRFamide      | 366.5 nM         | 270.4 nM to 491.3 nM | 31.7 nM          | 19.0 nM to 51.2 nM   |
| 3-3 | EAEPLGTMRFamide    | 866.7 nM         | 706.6 nM to 1.1 μM   | 288.3 nM         | 203.7 nM to 402.3 nM |
| 3-4 | NPLGTMRFamide      | 427.1 nM         | 351.7 nM to 516.3 nM | 10.7 nM          | 7.6 nM to 15.3 nM    |
| 3-5 | ASEDALFGTMRFamide  | 1.1 μM           | 946.2 nM to 1.4 μM   | 72.1 nM          | 51.1 nM to 101.3 nM  |
| 3-7 | SAEPFGTMRFamide    | 438.6 nM         | 351.3 nM to 530.1 nM | 39.5 nM          | 28.5 nM to 54.0 nM   |
| 3-8 | SADDSAPFGTMRFamide | N/A              | N/A                  | 1.6 μM           | 1.1 μM to 2.4 μM     |
| 3-9 | NPENDTPFGTMRFamide | 760.1 nM         | 624.1 nM to 923.3 nM | 88.3 nM          | 65.2 nM to 119.6 nM  |

Figure-4

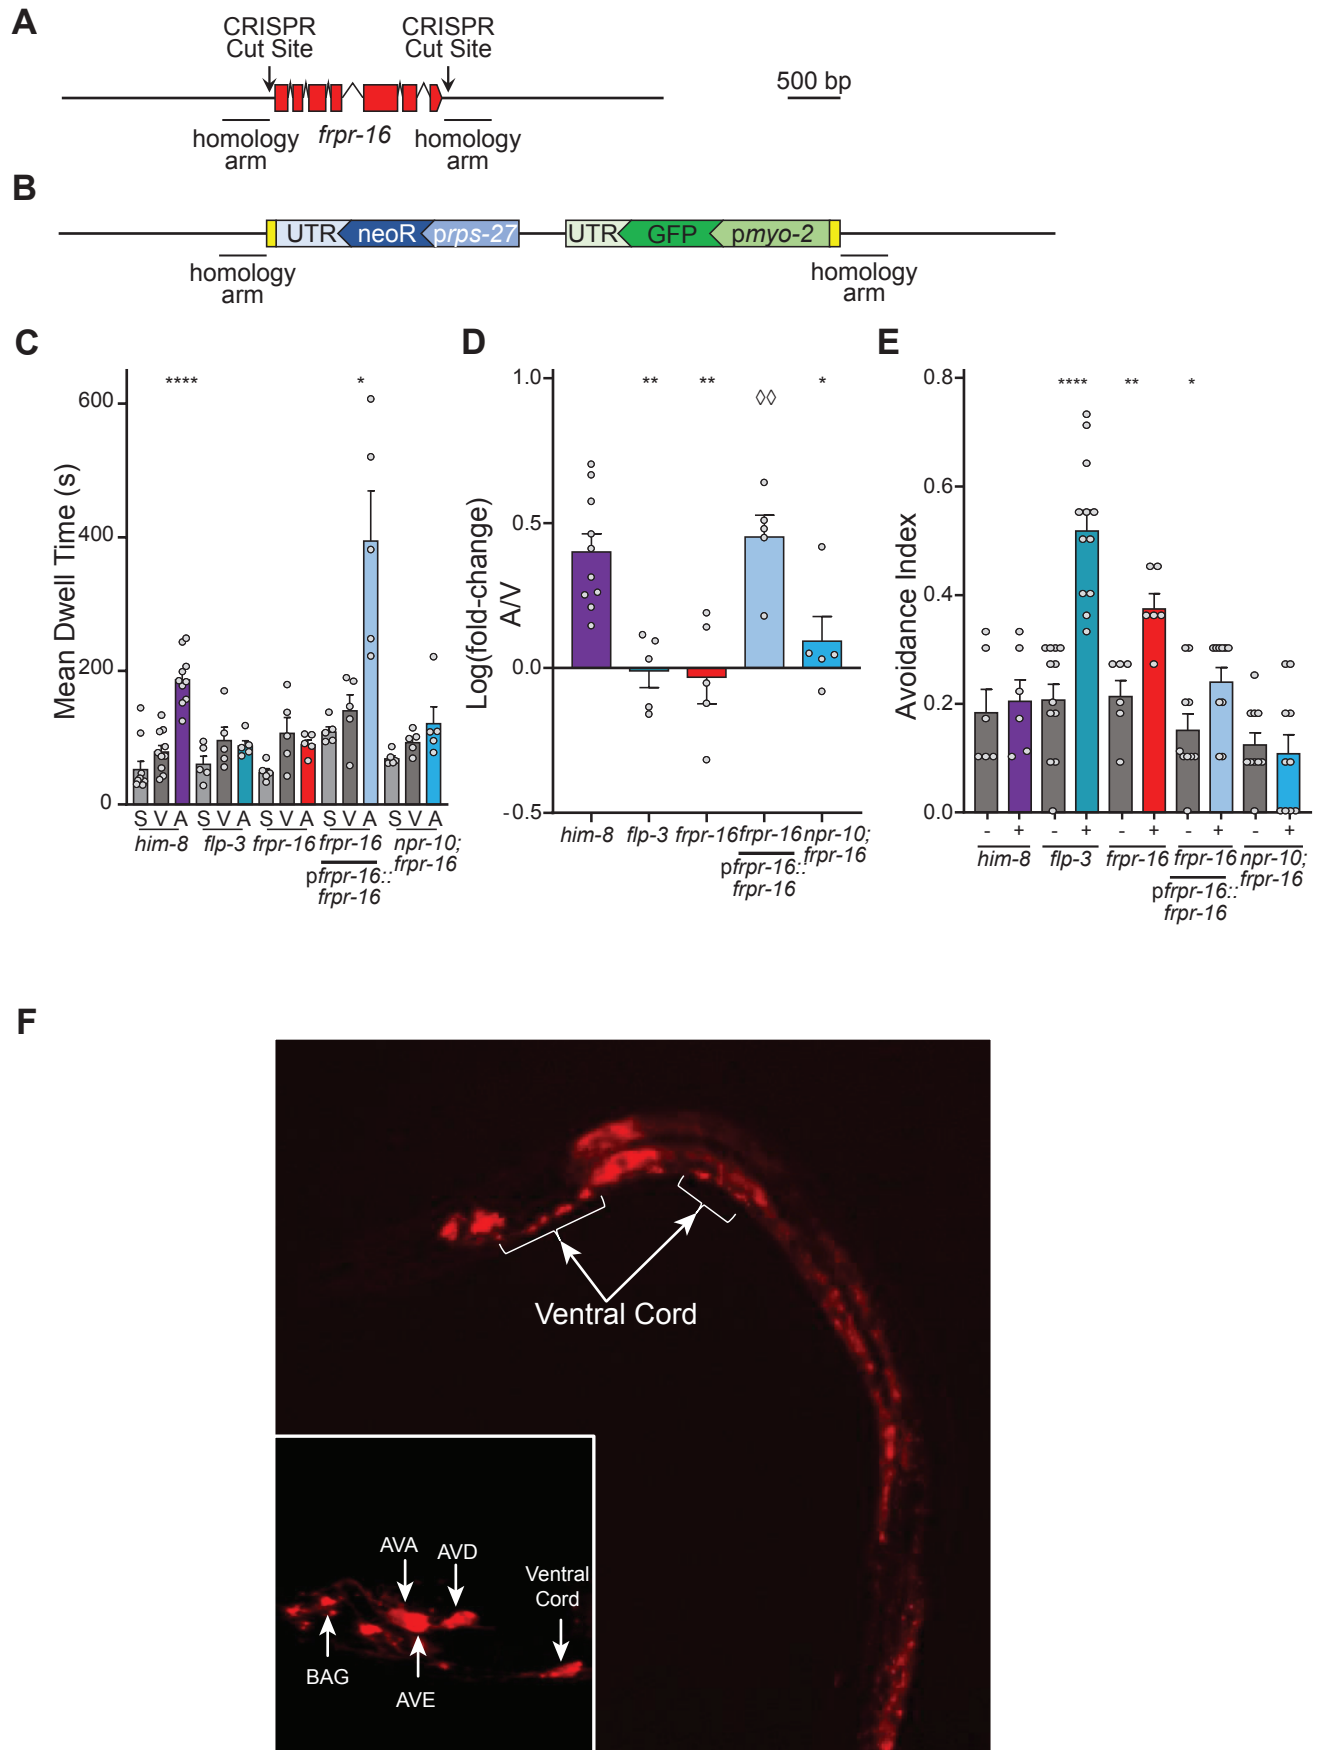

Figure-5

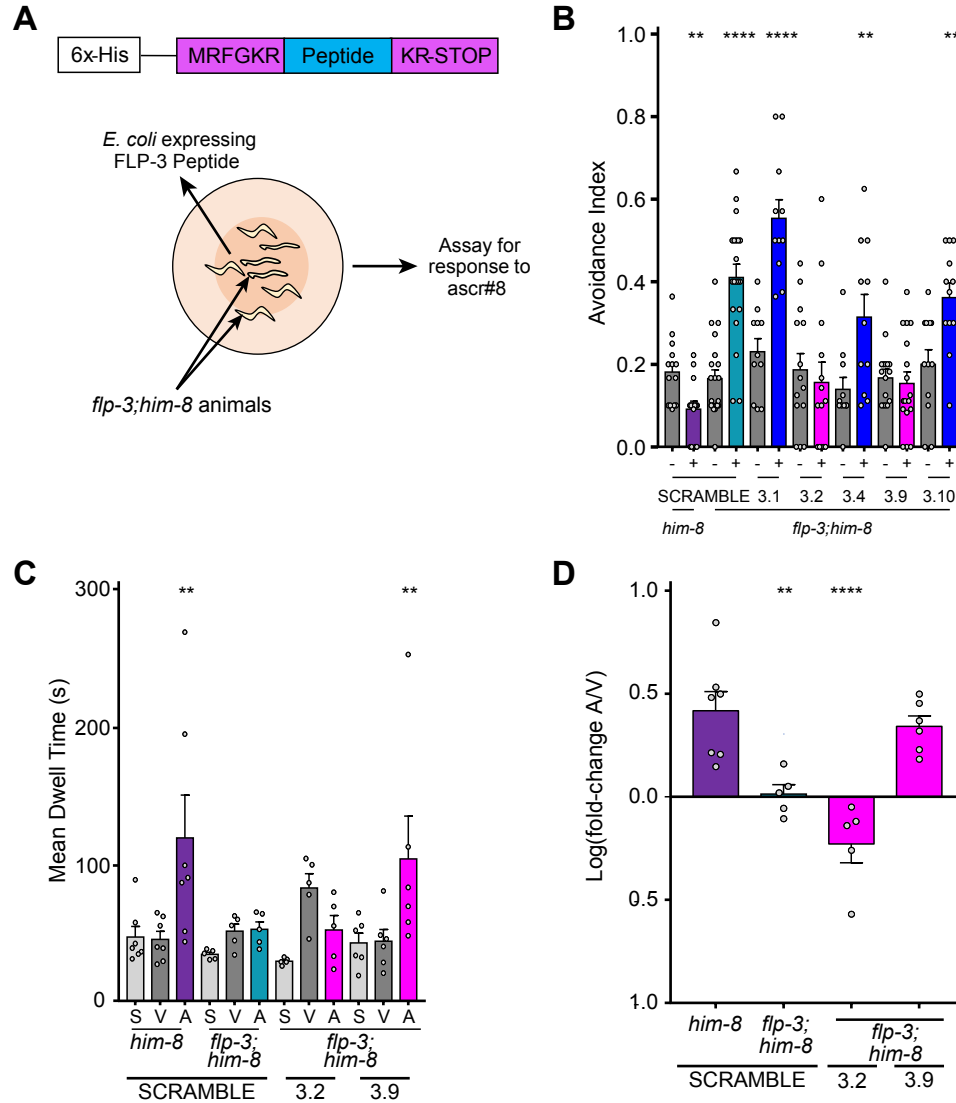

Figure-6

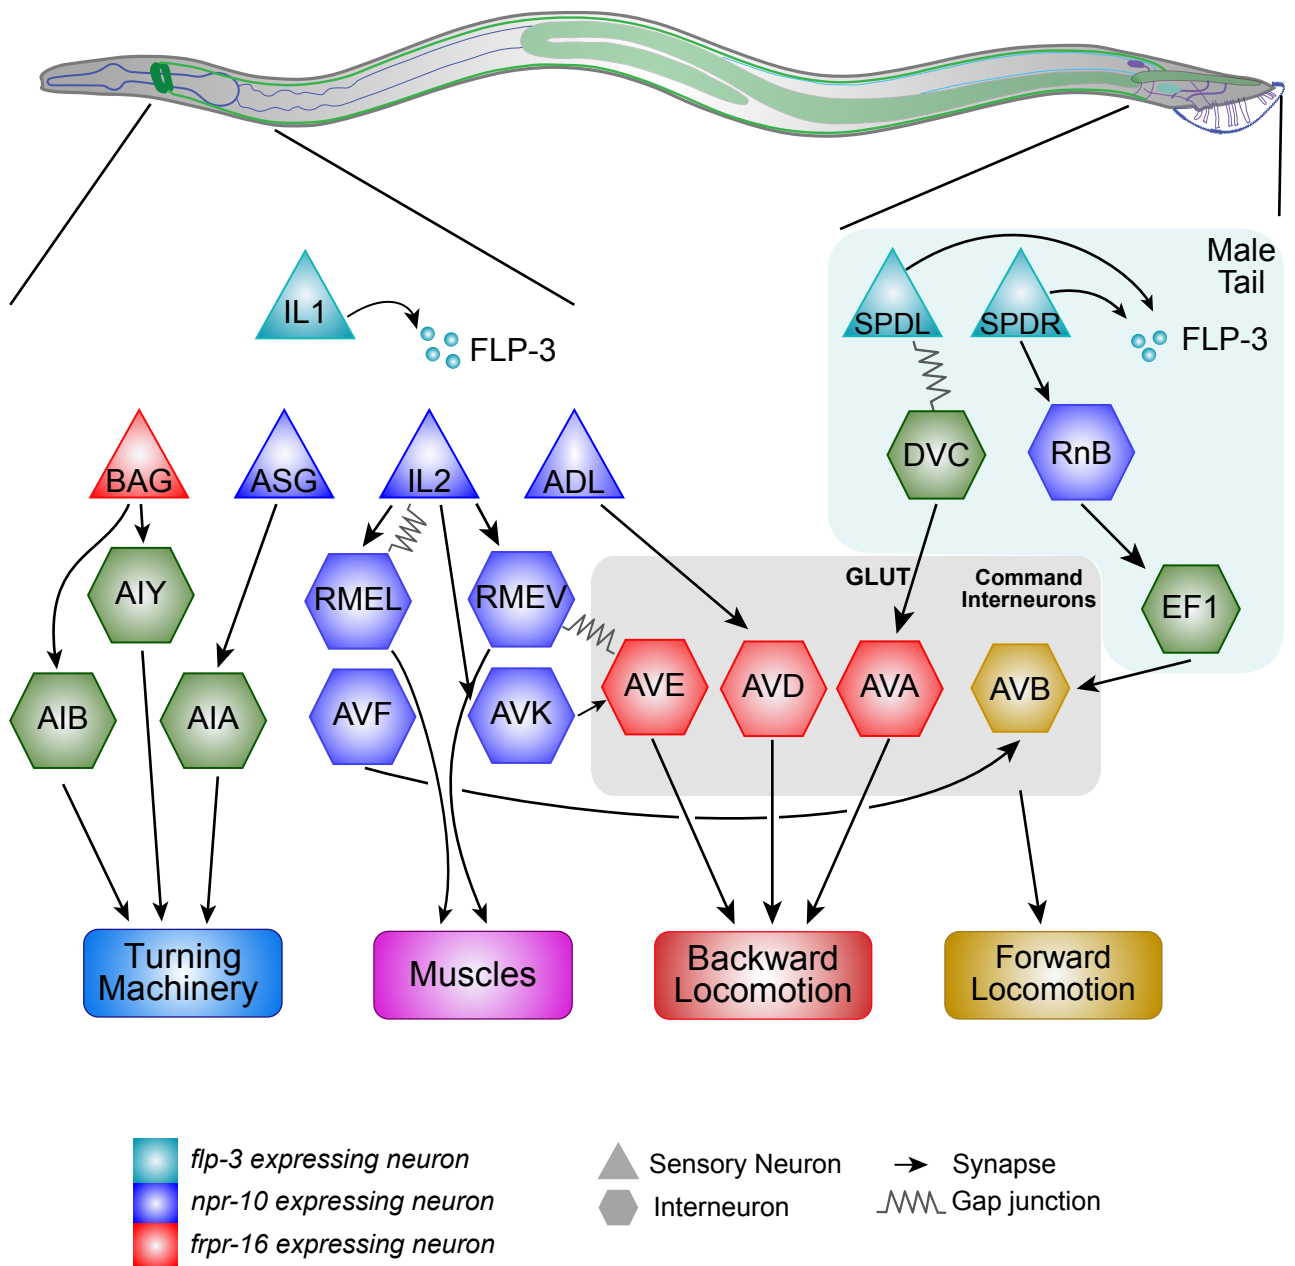

Figure-7
